# Supplementary material for: Maternal plasma folate impacts differential DNA methylation in an epigenome-wide meta-analysis of newborns
Source: PubMed Central journal article supplement (PMC4749955; doi:10.1038/ncomms10577), 2016-02-10
Supplement: ncomms10577-s1.pdf [file ncomms10577-s1.pdf]

**Maternal plasma folate impacts differential DNA methylation in an epigenome-wide meta-analysis of newborns**

**Supplementary Information**

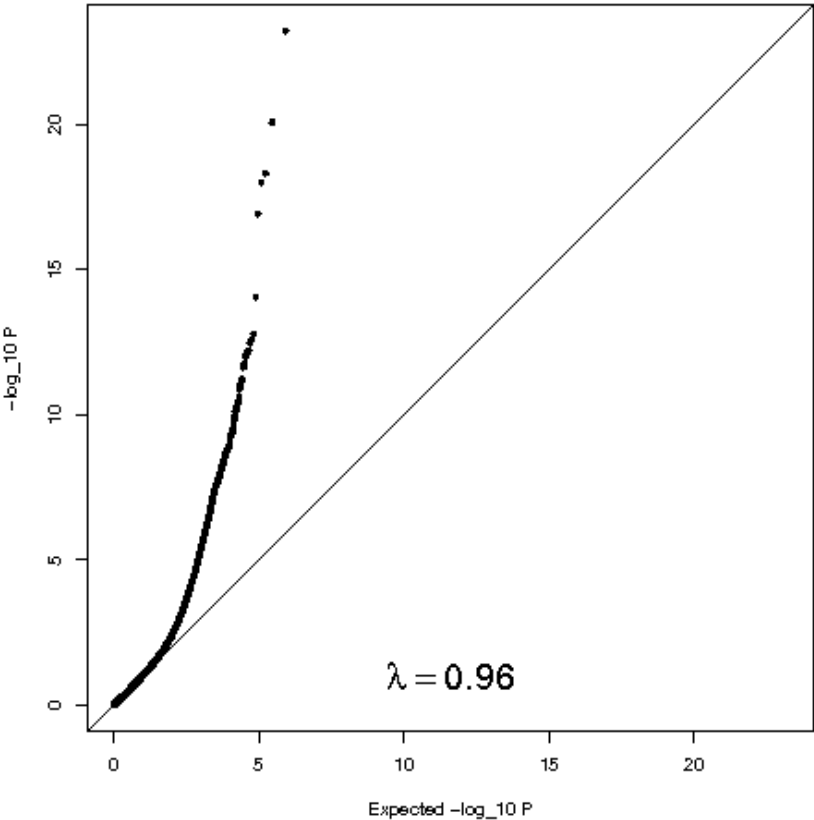

Supplementary Figure 1. Q-Q plot for the association between maternal plasma folate during pregnancy and DNA methylation in newborn cord blood, unadjusted for covariates. Meta-analysis results for MoBa (N=1,283) and Generation R (N=713) cohorts. The uncorrected  $-\log_{10}(P)$  values are plotted by expected  $-\log_{10}(P)$  values.  $\lambda$  indicates the genomic inflation factor (lambda) for the model.

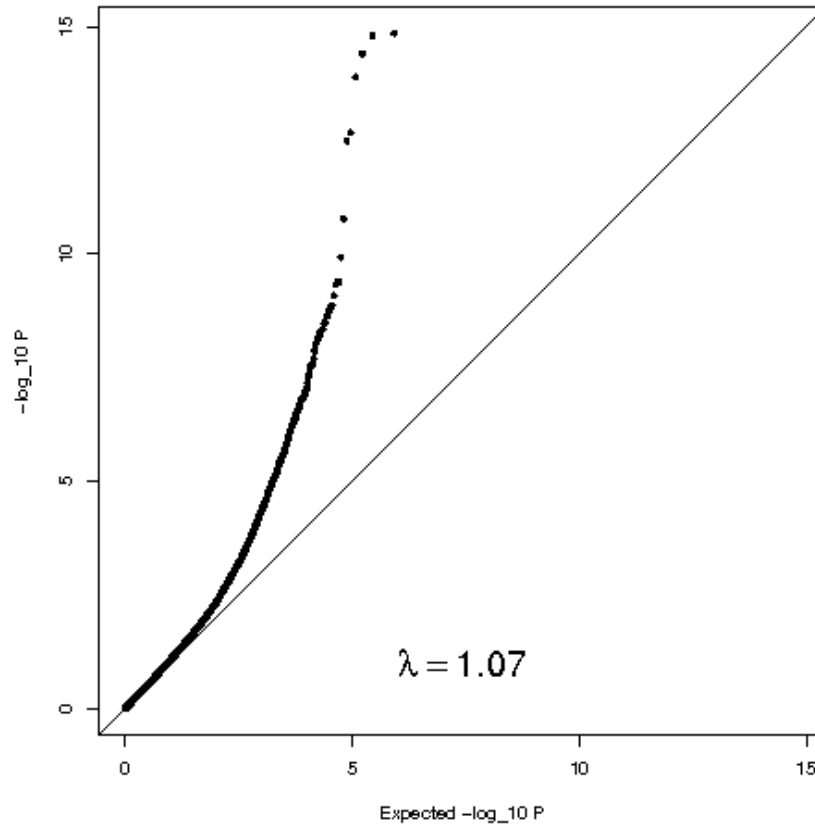

Supplementary Figure 2. Q-Q plot for the association between maternal plasma folate during pregnancy and DNA methylation in newborn cord blood, adjusted for covariates. Meta-analysis results for MoBa (N=1,283) and Generation R (N=713) cohorts. The uncorrected  $-\log_{10}(P)$  values are plotted by expected  $-\log_{10}(P)$  values.  $\lambda$  indicates the genomic inflation factor (lambda) for the model.

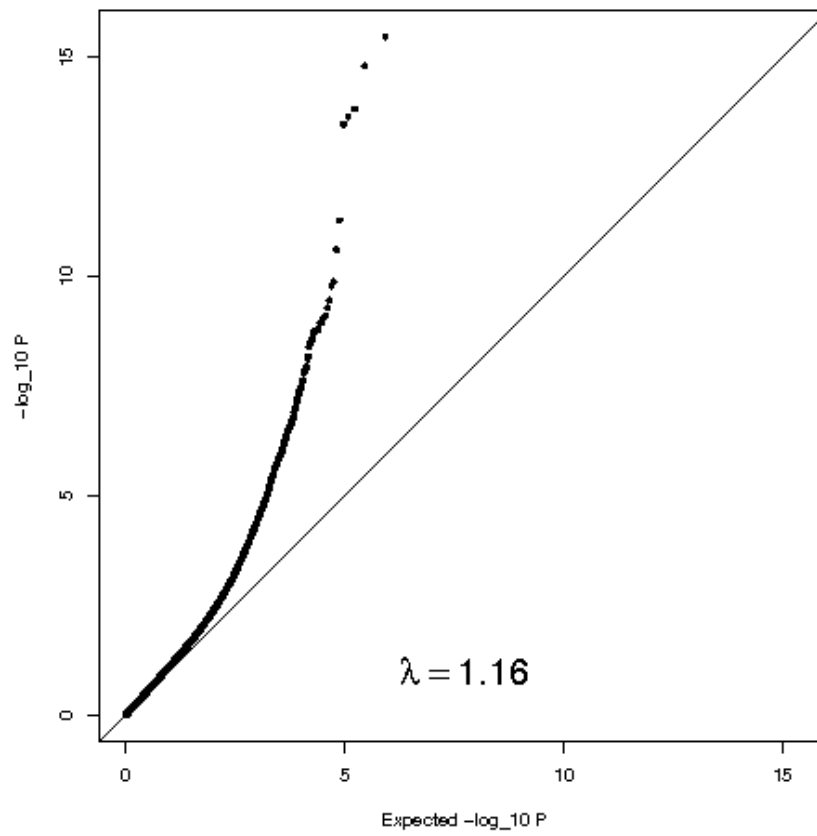

Supplementary Figure 3. Q-Q plot for the association between maternal plasma folate during pregnancy and DNA methylation in newborn cord blood, adjusted for covariates and cell type. Meta-analysis results for MoBa (N=1,283) and Generation R (N=713) cohorts. The uncorrected  $-\log_{10}(P$  values) are plotted by expected  $-\log_{10}(P$  values).  $\lambda$  indicates the genomic inflation factor (lambda) for the model.

Supplementary Table 1. Additional information on genes with significant CpGs after FDR correction in meta-analysis of the association between maternal plasma folate during pregnancy and DNA methylation in newborns

| Gene Symbol | Gene Name                                                              | Entrez Gene UID | Synonyms                                                                |
|-------------|------------------------------------------------------------------------|-----------------|-------------------------------------------------------------------------|
| AATF        | apoptosis antagonizing transcription factor                            | 26574           | BFR2; CHE-1; DED; CHE1                                                  |
| ABHD11      | abhydrolase domain containing 11                                       | 83451           | PP1226; WBSCR21                                                         |
| ADAMTS2     | ADAM metalloproteinase with thrombospondin type 1 motif, 2             | 9509            | NPI; ADAMTS-3; ADAMTS-2; PCINP; ADAM-TS2; PNPI; PCPNI; PC; I-NP; PCI-NP |
| ADCY8       | adenylate cyclase 8 (brain)                                            | 114             | AC8; HBAC1; ADCY3                                                       |
| ADRA2C      | adrenoceptor alpha 2C                                                  | 152             | ADRARL2; ALPHA2CAR; ADRA2RL2; ADRA2L2                                   |
| AJAP1       | adherens junctions associated protein 1                                | 55966           | MOT8; SHREW1; SHREW-1                                                   |
| ALG10       | ALG10, alpha-1,2-glucosyltransferase                                   | 84920           | DIE2; KCR1; ALG10A                                                      |
| ALG10       | ALG10, alpha-1,2-glucosyltransferase                                   | 84920           | DIE2; KCR1; ALG10A                                                      |
| ALX3        | ALX homeobox 3                                                         | 257             | FND; FND1                                                               |
| ANAPC7      | anaphase promoting complex subunit 7                                   | 51434           | APC7                                                                    |
| ANKRD30BP3  | ankyrin repeat domain 30B pseudogene 3                                 | 338579          | None                                                                    |
| AP3B2       | adaptor-related protein complex 3, beta 2 subunit                      | 8120            | NAPT8                                                                   |
| APC2        | adenomatous polyposis coli 2                                           | 10297           | APCL                                                                    |
| ARC         | activity-regulated cytoskeleton-associated protein                     | 23237           | Arg3.1                                                                  |
| ARRDC4      | arrestin domain containing 4                                           | 91947           | None                                                                    |
| ASCL4       | achaete-scute family bHLH transcription factor 4                       | 121549          | bHLHa44; HASH4                                                          |
| ATP5D       | ATP synthase, H+ transporting, mitochondrial F1 complex, delta subunit | 513             | None                                                                    |
| ATP8B3      | ATPase, aminophospholipid transporter, class I, type 8B, member 3      | 148229          | ATPIK                                                                   |
| BAI2        | brain-specific angiogenesis inhibitor 2                                | 576             | None                                                                    |
| BCL7A       | B-cell CLL/lymphoma 7A                                                 | 605             | BCL7                                                                    |
| BOD1L2      | bioorientation of chromosomes in cell division 1-like 2                | 284257          | BOD1P; FAM44C                                                           |
| BPGM        | 2,3-bisphosphoglycerate mutase                                         | 669             | DPGM                                                                    |
| BPIFA4P     | BPI fold containing family A, member 4, pseudogene                     | 317716          | BASE                                                                    |
| C11orf68    | chromosome 11 open reading frame 68                                    | 83638           | P5326; BLES03                                                           |
| C1orf35     | chromosome 1 open reading frame 35                                     | 79169           | MMTAG2; hMMTAG2                                                         |
| C3orf56     | chromosome 3 open reading frame 56                                     | 285311          | FLJ40141                                                                |
| C3P1        | complement component 3 precursor pseudogene                            | 388503          | CPLP                                                                    |
| C4orf17     | chromosome 4 open reading frame 17                                     | 84103           | None                                                                    |
| C6orf52     | chromosome 6 open reading frame 52                                     | 347744          | None                                                                    |
| CACNA1C     | calcium channel, voltage-dependent, L type, alpha 1C subunit           | 775             | CCHL1A1; CaV1.2; CACN2; CACNL1A1; TS; CACH2; LQT8                       |
| CACNG2      | calcium channel, voltage-dependent, gamma subunit 2                    | 10369           | MRD10                                                                   |
| CBLN2       | cerebellin 2 precursor                                                 | 147381          | None                                                                    |
| CCDC105     | coiled-coil domain containing 105                                      | 126402          | None                                                                    |
| CCDC115     | coiled-coil domain containing 115                                      | 84317           | ccp1                                                                    |
| CCDC166     | coiled-coil domain containing 166                                      | 100130274       | None                                                                    |
| CCDC177     | coiled-coil domain containing 177                                      | 56936           | PLPL; C14orf162                                                         |
| CCDC36      | coiled-coil domain containing 36                                       | 339834          | CT74                                                                    |
| CCDC64B     | coiled-coil domain containing 64B                                      | 146439          | BICDR-2                                                                 |
| CCDC9       | coiled-coil domain containing 9                                        | 26093           | None                                                                    |
| CCNG2       | cyclin G2                                                              | 901             | None                                                                    |
| CCT8L2      | chaperonin containing TCP1, subunit 8 (theta)-like 2                   | 150160          | CESK1                                                                   |
| CDC16       | cell division cycle 16                                                 | 8881            | APC6; CUT9; ANAPC6                                                      |
| CDIPT       | CDP-diacylglycerol--inositol 3-phosphatidyltransferase                 | 10423           | PIS, PIS1                                                               |
| CDO1        | cysteine dioxygenase type 1                                            | 1036            | None                                                                    |
| CELF6       | CUGBP, Elav-like family member 6                                       | 60677           | BRUNOL6                                                                 |
| CENPBD1     | CENPB DNA-binding domains containing 1                                 | 92806           | None                                                                    |
| CES1        | carboxylesterase 1                                                     | 1066            | SES1; HMSE; hCE-1; CE-1; CEH; REH; CES2; HMSE1; ACAT; TGH; PCE-1        |
| CFB         | complement factor B                                                    | 629             | GBG; BF; PBF2; CFAB; BFD; CFB; FB; ARMD14; FBI12; AHUS4; H2-Bf          |

| Gene Symbol          | Gene Name                                                                              | Entrez Gene UID | Synonyms                                                                          |
|----------------------|----------------------------------------------------------------------------------------|-----------------|-----------------------------------------------------------------------------------|
| <i>CFL1</i>          | cofilin 1 (non-muscle)                                                                 | 1072            | <i>CFL</i>                                                                        |
| <i>CHFR</i>          | checkpoint with forkhead and ring finger domains, E3 ubiquitin protein ligase          | 55743           | <i>RNF116; RNF196</i>                                                             |
| <i>CHODL</i>         | chondrolectin                                                                          | 140578          | <i>MT75; C21orf68; PRED12</i>                                                     |
| <i>CHRD</i>          | chordin                                                                                | 8646            | None                                                                              |
| <i>CKM</i>           | creatine kinase, muscle                                                                | 1158            | <i>CKMM; M-CK</i>                                                                 |
| <i>CLDN6</i>         | claudin 6                                                                              | 9074            | None                                                                              |
| <i>CLMN</i>          | calmin (calponin-like, transmembrane)                                                  | 79789           | None                                                                              |
| <i>CLSTN2</i>        | calsyntenin 2                                                                          | 64084           | <i>ALC-GAMMA; CDHR13; CSTN2; alcagamma; CS2</i>                                   |
| <i>CNPY1</i>         | canopy FGF signaling regulator 1                                                       | 285888          | None                                                                              |
| <i>CNST</i>          | consortin, connexin sorting protein                                                    | 63882           | <i>FLJ32001, PPP1R64</i>                                                          |
| <i>CNTNAP5</i>       | contactin associated protein-like 5                                                    | 129684          | <i>caspr5</i>                                                                     |
| <i>COL13A1</i>       | collagen, type XIII, alpha 1                                                           | 1305            | <i>COLXIII A1</i>                                                                 |
| <i>COPZ1</i>         | coatamer protein complex, subunit zeta 1                                               | 22818           | <i>COPZ; CGI-120; zeta1-COP; zeta-COP; HSPC181</i>                                |
| <i>CPLX1</i>         | complexin 1                                                                            | 10815           | <i>CPX-I; CPX1</i>                                                                |
| <i>CRHR1</i>         | corticotropin releasing hormone receptor 1                                             | 1394            | <i>CRHR1L; CRH-R-1; CRF-R1; CRFR-1; CRF1; CRFR1; CRF-R-1; CRH-R1; CRF-R; CRHR</i> |
| <i>CRIPAK</i>        | cysteine-rich PAK1 inhibitor                                                           | 285464          | None                                                                              |
| <i>CSMD1</i>         | CUB and Sushi multiple domains 1                                                       | 64478           | <i>PPP1R24</i>                                                                    |
| <i>CTRB2</i>         | chymotrypsinogen B2                                                                    | 440387          | None                                                                              |
| <i>CUX2</i>          | cut-like homeobox 2                                                                    | 23316           | <i>CDP2; CUTL2</i>                                                                |
| <i>CWH43</i>         | cell wall biogenesis 43 C-terminal homolog ( <i>S. cerevisiae</i> )                    | 80157           | <i>CWH43-C</i>                                                                    |
| <i>CYP4Z1</i>        | cytochrome P450, family 4, subfamily Z, polypeptide 1                                  | 199974          | <i>CYP4A20</i>                                                                    |
| <i>DCC</i>           | DCC netrin 1 receptor                                                                  | 1630            | <i>CRC18; CRCR1; NTN1R1; MRMV1; IGDCC1</i>                                        |
| <i>DDOST</i>         | dolichyl-diphosphooligosaccharide--protein glycosyltransferase subunit (non-catalytic) | 1650            | <i>CDG1R; OST48; OKSWcl45; OST; AGER1; WBP1</i>                                   |
| <i>DDX52</i>         | DEAD (Asp-Glu-Ala-Asp) box polypeptide 52                                              | 11056           | <i>HUSSY19; ROK1</i>                                                              |
| <i>DEFB115</i>       | defensin, beta 115                                                                     | 245929          | <i>DEFB-15</i>                                                                    |
| <i>DEFB116</i>       | defensin, beta 116                                                                     | 245930          | <i>DEFB-16</i>                                                                    |
| <i>DEFB125</i>       | defensin, beta 125                                                                     | 245938          | <i>DEFB-25</i>                                                                    |
| <i>DIRC3</i>         | disrupted in renal carcinoma 3                                                         | 729582          | None                                                                              |
| <i>DKFZp434L192</i>  | uncharacterized protein DKFZp434L192                                                   | 222029          | None                                                                              |
| <i>DKFZp686K1684</i> | uncharacterized LOC440034                                                              | 440034          | None                                                                              |
| <i>DKK1</i>          | dickkopf WNT signaling pathway inhibitor 1                                             | 22943           | <i>SK; DKK-1</i>                                                                  |
| <i>DMBT1P1</i>       | deleted in malignant brain tumors 1 pseudogene 1                                       | 375940          | <i>FLJ46361</i>                                                                   |
| <i>DRAP1</i>         | DR1-associated protein 1 (negative cofactor 2 alpha)                                   | 10589           | <i>NC2-alpha</i>                                                                  |
| <i>DRD5</i>          | dopamine receptor D5                                                                   | 1816            | <i>DRD1L2; DBDR; DRD1B</i>                                                        |
| <i>DUXAP10</i>       | double homeobox A pseudogene 10                                                        | 503639          | <i>AK022914</i>                                                                   |
| <i>EARS2</i>         | glutamyl-tRNA synthetase 2, mitochondrial                                              | 124454          | <i>COXPD12; MSE1</i>                                                              |
| <i>EBF3</i>          | early B-cell factor 3                                                                  | 253738          | <i>OE-2; COE3; O/E-2; EBF-3</i>                                                   |
| <i>ECSIT</i>         | ECSIT signalling integrator                                                            | 51295           | <i>SITPEC</i>                                                                     |
| <i>EIF3L</i>         | eukaryotic translation initiation factor 3, subunit L                                  | 51386           | <i>HSPC021; HSPC025; MSTP005; EIF3S11; EIF3EIP; EIF3S6IP</i>                      |
| <i>ELP3</i>          | elongator acetyltransferase complex subunit 3                                          | 55140           | <i>KAT9</i>                                                                       |
| <i>EMX2</i>          | empty spiracles homeobox 2                                                             | 2018            | None                                                                              |
| <i>EPS8L3</i>        | EPS8-like 3                                                                            | 79574           | <i>EPS8R3</i>                                                                     |
| <i>ESM1</i>          | endothelial cell-specific molecule 1                                                   | 11082           | <i>endocan</i>                                                                    |
| <i>FAHD1</i>         | fumarylacetoacetate hydrolase domain containing 1                                      | 81889           | <i>YISKL; C16orf36</i>                                                            |
| <i>FAM188B</i>       | family with sequence similarity 188, member B                                          | 84182           | <i>FLJ22374</i>                                                                   |
| <i>FAM193A</i>       | family with sequence similarity 193, member A                                          | 8603            | <i>RES4-22; C4orf8</i>                                                            |
| <i>FAM218A</i>       | family with sequence similarity 218, member A                                          | 152756          | <i>C4orf39</i>                                                                    |
| <i>FAM24A</i>        | family with sequence similarity 24, member A                                           | 118670          | None                                                                              |

| Gene Symbol         | Gene Name                                                                                           | Entrez Gene UID | Synonyms                                                             |
|---------------------|-----------------------------------------------------------------------------------------------------|-----------------|----------------------------------------------------------------------|
| <i>FAM27L</i>       | family with sequence similarity 27-like                                                             | 284123          | None                                                                 |
| <i>FAM83H</i>       | family with sequence similarity 83, member H                                                        | 286077          | AI3                                                                  |
| <i>FBRSL1</i>       | fibrosin-like 1                                                                                     | 57666           | None                                                                 |
| <i>FBXL18</i>       | F-box and leucine-rich repeat protein 18                                                            | 80028           | <i>Fbl18</i>                                                         |
| <i>FIGLA</i>        | folliculogenesis specific basic helix-loop-helix                                                    | 344018          | <i>BHLHC8; POF6; FIGALPHA</i>                                        |
| <i>FIS1</i>         | fission 1 (mitochondrial outer membrane) homolog ( <i>S. cerevisiae</i> )                           | 51024           | <i>TTC11; CGI-135</i>                                                |
| <i>FLJ36000</i>     | uncharacterized FLJ36000                                                                            | 284124          | None                                                                 |
| <i>FLYWCH2</i>      | FLYWCH family member 2                                                                              | 114984          | None                                                                 |
| <i>FOXA2</i>        | forkhead box A2                                                                                     | 3170            | <i>TCF3B; HNF3B</i>                                                  |
| <i>FOXN3</i>        | forkhead box N3                                                                                     | 1112            | <i>C14orf116; PRO1635; CHES1</i>                                     |
| <i>FRMD6</i>        | FERM domain containing 6                                                                            | 122786          | <i>Willin; c14_5320; C14orf31; EX1</i>                               |
| <i>FZD10</i>        | frizzled class receptor 10                                                                          | 11211           | <i>FZ-10; FzE7; hFz10; CD350; Fz10</i>                               |
| <i>FZD5</i>         | frizzled class receptor 5                                                                           | 7855            | <i>HFZ5; C2orf31</i>                                                 |
| <i>GABBR1</i>       | gamma-aminobutyric acid (GABA) B receptor, 1                                                        | 2550            | <i>GPRC3A; GABBR1-3; dJ271M21.1.2; dJ271M21.1.1; GABABR1; GB1</i>    |
| <i>GABRG3</i>       | gamma-aminobutyric acid (GABA) A receptor, gamma 3                                                  | 2567            | None                                                                 |
| <i>GJA3</i>         | gap junction protein, alpha 3, 46kDa                                                                | 2700            | <i>CTRCT14; CZP3; CX46</i>                                           |
| <i>GLI2</i>         | GLI family zinc finger 2                                                                            | 2736            | <i>CJS; HPE9; THP2; THP1; PHS2</i>                                   |
| <i>GLI4</i>         | GLI family zinc finger 4                                                                            | 2738            | <i>HKR4; ZNF928</i>                                                  |
| <i>GLRX3</i>        | glutaredoxin 3                                                                                      | 10539           | <i>GLRX4; TXNL2; GRX3; TXNL3; PICOT; GRX4</i>                        |
| <i>GNAI1</i>        | guanine nucleotide binding protein (G protein), alpha inhibiting activity polypeptide 1             | 2770            | None                                                                 |
| <i>GNG7</i>         | guanine nucleotide binding protein (G protein), gamma 7                                             | 2788            | None                                                                 |
| <i>GOLGA3</i>       | golgin A3                                                                                           | 2802            | <i>GCP170; MEA-2</i>                                                 |
| <i>GRIN1</i>        | glutamate receptor, ionotropic, N-methyl D-aspartate 1                                              | 2902            | <i>NMDA1; GluN1; MRD8; NMD-R1; NR1; NMDAR1</i>                       |
| <i>GRIN2B</i>       | glutamate receptor, ionotropic, N-methyl D-aspartate 2B                                             | 2904            | <i>MRD6; EIEE27; NR2B; hNR3; GluN2B; NMDAR2B</i>                     |
| <i>GRM8</i>         | glutamate receptor, metabotropic 8                                                                  | 2918            | <i>GPRC1H; GLUR8; mGlu8; MGLUR8</i>                                  |
| <i>GSG1L</i>        | GSG1-like                                                                                           | 146395          | <i>PRO19651</i>                                                      |
| <i>GUSBP10</i>      | glucuronidase, beta pseudogene 10                                                                   | 642006          | None                                                                 |
| <i>H19</i>          | H19, imprinted maternally expressed transcript (non-protein coding)                                 | 283120          | <i>WT2; BWS; NCRNA00008; ASM1; D11S813E; PRO2605; LINC00008; ASM</i> |
| <i>HES3</i>         | hes family bHLH transcription factor 3                                                              | 390992          | <i>bHLHb43</i>                                                       |
| <i>HIST3H2BB</i>    | histone cluster 3, H2bb                                                                             | 128312          | <i>H2Bb</i>                                                          |
| <i>HSD17B7P2</i>    | hydroxysteroid (17-beta) dehydrogenase 7 pseudogene 2                                               | 158160          | <i>Hsd17b_2; bA291L22.1; HSD17B7</i>                                 |
| <i>HSP90AA4P</i>    | heat shock protein 90kDa alpha (cytosolic), class A member 4, pseudogene                            | 3323            | <i>HSPCAL2; HSP90Ad</i>                                              |
| <i>IDH3B</i>        | isocitrate dehydrogenase 3 (NAD+) beta                                                              | 3420            | <i>RP46; H-IDHB</i>                                                  |
| <i>IGDCC4</i>       | immunoglobulin superfamily, DCC subclass, member 4                                                  | 57722           | <i>NOPE; DDM36</i>                                                   |
| <i>IHH</i>          | indian hedgehog                                                                                     | 3549            | <i>BDA1; HHG2</i>                                                    |
| <i>INMT-FAM188B</i> | INMT-FAM188B readthrough (NMD candidate)                                                            | 100526825       | None                                                                 |
| <i>INS-IGF2</i>     | INS-IGF2 readthrough                                                                                | 723961          | <i>INSIGF</i>                                                        |
| <i>IQCE</i>         | IQ motif containing E                                                                               | 23288           | <i>1700028P05Rik</i>                                                 |
| <i>KCNA1</i>        | potassium voltage-gated channel, shaker-related subfamily, member 1 (episodic ataxia with myokymia) | 3736            | <i>KV1.1; RBK1; HUK1; AEMK; MK1; EA1; MBK1; HBK1</i>                 |
| <i>KCNJ9</i>        | potassium inwardly-rectifying channel, subfamily J, member 9                                        | 3765            | <i>GIRK3; KIR3.3</i>                                                 |
| <i>KCNQ1DN</i>      | KCNQ1 downstream neighbor (non-protein coding)                                                      | 55539           | <i>BWRT; HSA404617</i>                                               |
| <i>KCNV1</i>        | potassium channel, subfamily V, member 1                                                            | 27012           | <i>KCNB3; KV8.1; HNK1; KV2.3</i>                                     |
| <i>KIAA0125</i>     | KIAA0125                                                                                            | 9834            | <i>FAM30A; HSPC053; C14orf110</i>                                    |
| <i>KIF26A</i>       | kinesin family member 26A                                                                           | 26153           | None                                                                 |
| <i>KIZ</i>          | kizuna centrosomal protein                                                                          | 55857           | <i>Kizuna; C20orf19; HT013; RP69; PLK1S1; NCRNA00153</i>             |
| <i>KLHL18</i>       | kelch-like family member 18                                                                         | 23276           | None                                                                 |
| <i>KLHL35</i>       | kelch-like family member 35                                                                         | 283212          | None                                                                 |
| <i>KLK4</i>         | kallikrein-related peptidase 4                                                                      | 9622            | <i>PSTS; EMSP; PRSS17; ARM1; KLK-L1; EMSP1; AI2A1; kallikrein</i>    |

| Gene Symbol         | Gene Name                                                                                      | Entrez Gene UID | Synonyms                                                                      |
|---------------------|------------------------------------------------------------------------------------------------|-----------------|-------------------------------------------------------------------------------|
| <i>KLKP1</i>        | kallikrein pseudogene 1                                                                        | 606293          | <i>YKLK1; KLK31P; KARMA; KRSP1; PsiKLK1</i>                                   |
| <i>KREMEN2</i>      | kringle containing transmembrane protein 2                                                     | 79412           | <i>KRM2</i>                                                                   |
| <i>KRT28</i>        | keratin 28                                                                                     | 162605          | <i>KRT25D</i>                                                                 |
| <i>LAMP5</i>        | lysosomal-associated membrane protein family, member 5                                         | 24141           | <i>BADLAMP; BAD-LAMP; UNC-43; LAMP-5; C20orf103</i>                           |
| <i>LHX1</i>         | LIM homeobox 1                                                                                 | 3975            | <i>LIM1; LIM-1</i>                                                            |
| <i>LINC00051</i>    | long intergenic non-protein coding RNA 51                                                      | 619434          | <i>NCRNA00051; C8orf43</i>                                                    |
| <i>LINC00469</i>    | long intergenic non-protein coding RNA 469                                                     | 283982          | <i>C17orf54</i>                                                               |
| <i>LINC00608</i>    | long intergenic non-protein coding RNA 608                                                     | 51300           | None                                                                          |
| <i>LINC01566</i>    | long intergenic non-protein coding RNA 1566                                                    | 283914          | <i>LOC283914</i>                                                              |
| <i>LMO1</i>         | LIM domain only 1 (rhototin 1)                                                                 | 4004            | <i>TTG1; RHOM1; RBTN1</i>                                                     |
| <i>LMX1B</i>        | LIM homeobox transcription factor 1, beta                                                      | 4010            | <i>NPS1; LMX1.2</i>                                                           |
| <i>LOC100129636</i> | uncharacterized LOC100129636                                                                   | 100129636       | None                                                                          |
| <i>LOC100130700</i> | uncharacterized LOC100130700                                                                   | 100130700       | None                                                                          |
| <i>LOC100240728</i> | uncharacterized LOC100240728                                                                   | None            | <i>BC036258</i>                                                               |
| <i>LOC100294362</i> | uncharacterized LOC100294362                                                                   | 100294362       | None                                                                          |
| <i>LOC100506526</i> | uncharacterized LOC100506526                                                                   | None            | <i>BC039381</i>                                                               |
| <i>LOC283194</i>    | uncharacterized LOC283194                                                                      | 283194          | None                                                                          |
| <i>LOC650226</i>    | ankyrin repeat domain 26 pseudogene                                                            | 650226          | None                                                                          |
| <i>LOC654342</i>    | lymphocyte-specific protein 1 pseudogene                                                       | 654342          | None                                                                          |
| <i>LOC728739</i>    | programmed cell death 2 pseudogene                                                             | 728739          | None                                                                          |
| <i>LRIF1</i>        | ligand dependent nuclear receptor interacting factor 1                                         | 55791           | <i>C1orf103; RIF1</i>                                                         |
| <i>LRIT2</i>        | leucine-rich repeat, immunoglobulin-like and transmembrane domains 2                           | 340745          | <i>LRRC22</i>                                                                 |
| <i>LRRC26</i>       | leucine rich repeat containing 26                                                              | 389816          | <i>bA350O14.10; CAPC</i>                                                      |
| <i>MAP2K3</i>       | mitogen-activated protein kinase kinase 3                                                      | 5606            | <i>PRKMK3; MEK3; MAPKK3; SAPKK2; SAPKK-2; MKK3</i>                            |
| <i>MAP3K10</i>      | mitogen-activated protein kinase kinase kinase 10                                              | 4294            | <i>MLK2; MEKK10; MST</i>                                                      |
| <i>MAP4K3</i>       | mitogen-activated protein kinase kinase kinase kinase 3                                        | 8491            | <i>MEKKK3; MAPKKKK3; GLK; MEKKK; 3; RAB8IPL1</i>                              |
| <i>MC3R</i>         | melanocortin 3 receptor                                                                        | 4159            | <i>OQTL; OB20; MC3-R; MC3; BMIQ9</i>                                          |
| <i>MED24</i>        | mediator complex subunit 24                                                                    | 9862            | <i>THRAP4; CRSP100; ARC100; CRSP4; TRAP100; DRIP100</i>                       |
| <i>MGC72080</i>     | MGC72080 pseudogene                                                                            | 389538          | None                                                                          |
| <i>MICU2</i>        | mitochondrial calcium uptake 2                                                                 | 221154          | <i>EFHA1; 1110008L20Rik</i>                                                   |
| <i>MIR205HG</i>     | MIR205 host gene                                                                               | 642587          | <i>LINC00510</i>                                                              |
| <i>MIR3147</i>      | microRNA 3147                                                                                  | 100422939       | None                                                                          |
| <i>MIR4283-1</i>    | microRNA 4283-1                                                                                | 100422917       | None                                                                          |
| <i>MIR548G</i>      | microRNA 548g                                                                                  | 100313938       | <i>hsa-mir-548g; MIRN548G</i>                                                 |
| <i>MIR9-3</i>       | microRNA 9-3                                                                                   | 407051          | <i>MIRN9-3; hsa-mir-9-3; miRNA9-3</i>                                         |
| <i>MKI67</i>        | marker of proliferation Ki-67                                                                  | 4288            | <i>MIB-; KIA; MIB-1; PPP1R105</i>                                             |
| <i>MLLT1</i>        | myeloid/lymphoid or mixed-lineage leukemia (trithorax homolog, Drosophila); translocated to, 1 | 4298            | <i>LTG19; YEATS1; ENL</i>                                                     |
| <i>MMEL1</i>        | membrane metallo-endopeptidase-like 1                                                          | 79258           | <i>NL1; NEP2; NL2; SEP; MMEL2; NEPII</i>                                      |
| <i>MTRNR2L1</i>     | MT-RNR2-like 1                                                                                 | 100462977       | <i>HN1</i>                                                                    |
| <i>MTRNR2L7</i>     | MT-RNR2-like 7                                                                                 | 100288485       | <i>HN7</i>                                                                    |
| <i>NCAPH</i>        | non-SMC condensin I complex, subunit H                                                         | 23397           | <i>BRRN1; CAP-H</i>                                                           |
| <i>NDUFA13</i>      | NADH dehydrogenase (ubiquinone) 1 alpha subcomplex, 13                                         | 51079           | <i>B16.6, CDA016, CGI-39, GRIM-19, GRIM19</i>                                 |
| <i>NEUROG1</i>      | neurogenin 1                                                                                   | 4762            | <i>NEUROD3; AKA; Math4C; bHLHa6; ngn1</i>                                     |
| <i>NOXO1</i>        | NADPH oxidase organizer 1                                                                      | 124056          | <i>SH3PXD5; P41NOX; SNX28; P41NOXC; P41NOXB; P41NOXA</i>                      |
| <i>NPAS4</i>        | neuronal PAS domain protein 4                                                                  | 266743          | <i>Le-PAS; PASD10; NXF; bHLHe79</i>                                           |
| <i>NR2E1</i>        | nuclear receptor subfamily 2, group E, member 1                                                | 7101            | <i>XTLL; TLX; TLL</i>                                                         |
| <i>NTF4</i>         | neurotrophin 4                                                                                 | 4909            | <i>NTF5; NT-4/5; NT5; NT4; GLC10; GLC10; NT-5; NT-4</i>                       |
| <i>OCA2</i>         | oculocutaneous albinism II                                                                     | 4948            | <i>HCL3; SHEP1; BEY1; BEY2; EYCL; BOCA; P; BEY; PED; EYCL2; EYCL3; D15S12</i> |
| <i>ODF3</i>         | outer dense fiber of sperm tails 3                                                             | 113746          | <i>CT135, hSHIPPO, SHIPPO1</i>                                                |
| <i>OGDH</i>         | oxoglutarate (alpha-ketoglutarate) dehydrogenase (lipoamide)                                   | 4967            | <i>OGDC; E1k; AKGDH</i>                                                       |

| Gene Symbol    | Gene Name                                                                           | Entrez Gene UID | Synonyms                                                                                                                               |
|----------------|-------------------------------------------------------------------------------------|-----------------|----------------------------------------------------------------------------------------------------------------------------------------|
| <i>ONECUT1</i> | one cut homeobox 1                                                                  | 3175            | <i>HNF-6; HNF6A; HNF6</i>                                                                                                              |
| <i>OPCML</i>   | opioid binding protein/cell adhesion molecule-like                                  | 4978            | <i>OBCAM; OPCM; IGLON1</i>                                                                                                             |
| <i>OR1A2</i>   | olfactory receptor, family 1, subfamily A, member 2                                 | 26189           | <i>OR17-6</i>                                                                                                                          |
| <i>OR1E1</i>   | olfactory receptor, family 1, subfamily E, member 1                                 | 8387            | <i>OR1E8P; OR17-2; OST547; OR1E6; OR17-32; HGM071; OR1E5; OR1E9P; OR13-66</i>                                                          |
| <i>OR1F1</i>   | olfactory receptor, family 1, subfamily F, member 1                                 | 4992            | <i>OR16-88; OLFMF; OR16-36; OR16-37; OR16-90; OR1F13P; OR1F10; OR1F7; OR1F6; OR1F5; OR1F4; ORL1023; OR1F9; OR1F8; OR3-145; OR16-89</i> |
| <i>OR2W1</i>   | olfactory receptor, family 2, subfamily W, member 1                                 | 26692           | <i>hs6M1-15</i>                                                                                                                        |
| <i>OR4K2</i>   | olfactory receptor, family 4, subfamily K, member 2                                 | 390431          | <i>OR14-15</i>                                                                                                                         |
| <i>OR4L1</i>   | olfactory receptor, family 4, subfamily L, member 1                                 | 122742          | <i>OR14-28; OR4L2P</i>                                                                                                                 |
| <i>OR7E37P</i> | olfactory receptor, family 7, subfamily E, member 37 pseudogene                     | 100506759       | <i>OR7E48P; OST193; hg533</i>                                                                                                          |
| <i>ORAOV1</i>  | oral cancer overexpressed 1                                                         | 220064          | <i>TAOS1</i>                                                                                                                           |
| <i>OSBPL7</i>  | oxysterol binding protein-like 7                                                    | 114881          | <i>ORP7</i>                                                                                                                            |
| <i>OTOP1</i>   | otopetirin 1                                                                        | 133060          | <i>None</i>                                                                                                                            |
| <i>PABPC3</i>  | poly(A) binding protein, cytoplasmic 3                                              | 5042            | <i>tPABP; PABPL3; PABP3</i>                                                                                                            |
| <i>PADI2</i>   | peptidyl arginine deiminase, type II                                                | 11240           | <i>PDI2; PAD2; PAD-H19</i>                                                                                                             |
| <i>PAIP2B</i>  | poly(A) binding protein interacting protein 2B                                      | 400961          | <i>None</i>                                                                                                                            |
| <i>PANX2</i>   | pannexin 2                                                                          | 56666           | <i>PX2; hPANX2</i>                                                                                                                     |
| <i>PARP11</i>  | poly (ADP-ribose) polymerase family, member 11                                      | 57097           | <i>MIB006; ARTD11; C12orf6</i>                                                                                                         |
| <i>PAX6</i>    | paired box 6                                                                        | 5080            | <i>AN, D11S812E, WAGR</i>                                                                                                              |
| <i>PCDHB6</i>  | protocadherin beta 6                                                                | 56130           | <i>PCDH-BETA6</i>                                                                                                                      |
| <i>PCP2</i>    | Purkinje cell protein 2                                                             | 126006          | <i>GPSM4</i>                                                                                                                           |
| <i>PCSK9</i>   | proprotein convertase subtilisin/kexin type 9                                       | 255738          | <i>PC9; FH3; HCHOLA3; NARC1; LDLQC1; NARC-1</i>                                                                                        |
| <i>PLEKHD1</i> | pleckstrin homology domain containing, family D (with coiled-coil domains) member 1 | 400224          | <i>UPF0639</i>                                                                                                                         |
| <i>PLXNA1</i>  | plexin A1                                                                           | 5361            | <i>NOV; PLEXIN-A1; PLXN1; NOVp</i>                                                                                                     |
| <i>POLR3A</i>  | polymerase (RNA) III (DNA directed) polypeptide A, 155kDa                           | 11128           | <i>RPC155; HLD7; hRPC155; RPC1; ADDH</i>                                                                                               |
| <i>POTEA</i>   | POTE ankyrin domain family, member A                                                | 340441          | <i>POTE-8; CT104.3; A26A1; POTE8</i>                                                                                                   |
| <i>POTEH</i>   | POTE ankyrin domain family, member H                                                | 23784           | <i>CT104.7; A26C3; POTE22; ACTBL1</i>                                                                                                  |
| <i>PPIE</i>    | peptidylprolyl isomerase E (cyclophilin E)                                          | 10450           | <i>CYP-33; CYP33</i>                                                                                                                   |
| <i>PPP1R3G</i> | protein phosphatase 1, regulatory subunit 3G                                        | 648791          | <i>None</i>                                                                                                                            |
| <i>PRDM1</i>   | PR domain containing 1, with ZNF domain                                             | 639             | <i>PRDI-BF1; BLIMP1</i>                                                                                                                |
| <i>PRDM13</i>  | PR domain containing 13                                                             | 59336           | <i>PFM10; MU-MB-20.220</i>                                                                                                             |
| <i>PRG3</i>    | proteoglycan 3                                                                      | 10394           | <i>MBPH; MBP2</i>                                                                                                                      |
| <i>PRPH</i>    | peripherin                                                                          | 5630            | <i>NEF4; PRPH1</i>                                                                                                                     |
| <i>PRR14L</i>  | proline rich 14-like                                                                | 253143          | <i>C22orf30</i>                                                                                                                        |
| <i>PRR18</i>   | proline rich 18                                                                     | 285800          | <i>None</i>                                                                                                                            |
| <i>PRR30</i>   | proline rich 30                                                                     | 339779          | <i>C2orf53</i>                                                                                                                         |
| <i>PRR30</i>   | proline rich 30                                                                     | 39779           | <i>MGC44505</i>                                                                                                                        |
| <i>PRSS21</i>  | protease, serine, 21 (testisin)                                                     | 10942           | <i>TEST1; ESP1; TESTISIN; ESP-1</i>                                                                                                    |
| <i>PSPH</i>    | phosphoserine phosphatase                                                           | 5723            | <i>PSP</i>                                                                                                                             |
| <i>PTGER3</i>  | prostaglandin E receptor 3 (subtype EP3)                                            | 5733            | <i>EP3-IV; PGE2-R; EP3e; EP3; EP3-III; EP3-I; EP3-II</i>                                                                               |
| <i>PTHLH</i>   | parathyroid hormone-like hormone                                                    | 5744            | <i>PTHr; BDE2; PTHRP; HHM; PLP</i>                                                                                                     |
| <i>PTPRH</i>   | protein tyrosine phosphatase, receptor type, H                                      | 5794            | <i>R-PTP-H; SAP1</i>                                                                                                                   |
| <i>PTPRU</i>   | protein tyrosine phosphatase, receptor type, U                                      | 10076           | <i>FMI, hPTP-J, PCP-2, PTP, PTPRO</i>                                                                                                  |
| <i>PTX4</i>    | pentraxin 4, long                                                                   | 390667          | <i>C16orf38</i>                                                                                                                        |
| <i>PXDC1</i>   | PX domain containing 1                                                              | 221749          | <i>C6orf145</i>                                                                                                                        |
| <i>QTRT1</i>   | queuine tRNA-ribosyltransferase 1                                                   | 81890           | <i>TGUT; TGT; FP3235</i>                                                                                                               |
| <i>RASA3</i>   | RAS p21 protein activator 3                                                         | 22821           | <i>GAPIII; GAP1IP4BP</i>                                                                                                               |
| <i>REEP1</i>   | receptor accessory protein 1                                                        | 65055           | <i>SPG31; C2orf23; HMN5B</i>                                                                                                           |
| <i>RGCC</i>    | regulator of cell cycle                                                             | 28984           | <i>RGC-32; bA157L14.2; C13orf15; RGC32</i>                                                                                             |
| <i>RNF180</i>  | ring finger protein 180                                                             | 285671          | <i>RINES</i>                                                                                                                           |



| Gene Symbol        | Gene Name                                                   | Entrez Gene UID | Synonyms                                                          |
|--------------------|-------------------------------------------------------------|-----------------|-------------------------------------------------------------------|
| <i>RNF207</i>      | ring finger protein 207                                     | 388591          | <i>C1orf188</i>                                                   |
| <i>ROBO3</i>       | roundabout, axon guidance receptor, homolog 3 (Drosophila)  | 64221           | <i>HGPS; RIG1; RBIG1; HGPPS</i>                                   |
| <i>ROPN1</i>       | rophilin associated tail protein 1                          | 54763           | <i>ROPN1A; RHPNAP1; ODF6; ropporin; CT91</i>                      |
| <i>RPA1</i>        | replication protein A1, 70kDa                               | 6117            | <i>HSSB; RF-A; RP-A; REPA1; MST075; RPA70</i>                     |
| <i>SALL1</i>       | spalt-like transcription factor 1                           | 6299            | <i>HSAL1; ZNF794; TBS; HEL-S-89; Sal-1</i>                        |
| <i>SARM1</i>       | sterile alpha and TIR motif containing 1                    | 23098           | <i>MyD88-5; SAMD2; SARM</i>                                       |
| <i>SCGB1C1</i>     | secretoglobulin, family 1C, member 1                        | 147199          | <i>RYD5</i>                                                       |
| <i>SCGB1D4</i>     | secretoglobulin, family 1D, member 4                        | 404552          | None                                                              |
| <i>SEC14L3</i>     | SEC14-like 3 ( <i>S. cerevisiae</i> )                       | 266629          | <i>TAP2</i>                                                       |
| <i>SELV</i>        | selenoprotein V                                             | 348303          | None                                                              |
| <i>SFSWAP</i>      | splicing factor, suppressor of white-apricot family         | 6433            | <i>SWAP; SFRS8</i>                                                |
| <i>SLC16A12</i>    | solute carrier family 16, member 12                         | 387700          | <i>MCT12; CJMG</i>                                                |
| <i>SLC39A3</i>     | solute carrier family 39 (zinc transporter), member 3       | 29985           | <i>ZIP3; ZIP-3</i>                                                |
| <i>SLC39A7</i>     | solute carrier family 39 (zinc transporter), member 7       | 7922            | <i>HKE4; RING5; H2-KE4; D6S115E; D6S2244E; KE4; ZIP7</i>          |
| <i>SLCO2B1</i>     | solute carrier organic anion transporter family, member 2B1 | 11309           | <i>OATP2B1; OATP-B; SLC21A9; OATPB</i>                            |
| <i>SNAP47</i>      | synaptosomal-associated protein, 47kDa                      | 116841          | <i>SVAP1; HEL170; SNAP-47; C1orf142</i>                           |
| <i>SNORD115-11</i> | small nucleolar RNA, C/D box 115-11                         | 100033448       | <i>HBII-52-11</i>                                                 |
| <i>SNORD115-15</i> | small nucleolar RNA, C/D box 115-15                         | 100033453       | <i>HBII-52-15</i>                                                 |
| <i>SNORD116-11</i> | small nucleolar RNA, C/D box 116-11                         | 100033423       | <i>HBII-85-11</i>                                                 |
| <i>SNORD116-12</i> | small nucleolar RNA, C/D box 116-12                         | 100033424       | <i>HBII-85-12</i>                                                 |
| <i>SNORD116-17</i> | small nucleolar RNA, C/D box 116-17                         | 100033429       | <i>HBII-85-17</i>                                                 |
| <i>SNORD116-18</i> | small nucleolar RNA, C/D box 116-18                         | 100033430       | <i>HBII-85-18</i>                                                 |
| <i>SNRPN</i>       | small nuclear ribonucleoprotein polypeptide N               | 6638            | <i>SMN; PWCR; SM-D; sm-N; RT-LI; HCERN3; SNRNP-N; SNURF-SNRPN</i> |
| <i>SNX32</i>       | sorting nexin 32                                            | 254122          | <i>SNX6B</i>                                                      |
| <i>SOX14</i>       | SRY (sex determining region Y)-box 14                       | 8403            | <i>SOX28</i>                                                      |
| <i>SPRY2</i>       | sprouty homolog 2 (Drosophila)                              | 10253           | <i>hSPRY2</i>                                                     |
| <i>STMN2</i>       | stathmin 2                                                  | 11075           | <i>SCG10; SCGN10</i>                                              |
| <i>SUMF1</i>       | sulfatase modifying factor 1                                | 285362          | <i>FGE; UNQ3037; AAPA3037</i>                                     |
| <i>SYT5</i>        | synaptotagmin V                                             | 6861            | None                                                              |
| <i>TBX3</i>        | T-box 3                                                     | 6926            | <i>TBX3-ISO; UMS; XHL</i>                                         |
| <i>TCTE1</i>       | t-complex-associated-testis-expressed 1                     | 202500          | <i>D6S46; FAP155</i>                                              |
| <i>TEKT2</i>       | tektin 2 (testicular)                                       | 27285           | <i>h-tektin-t; TEKTB1; TEKTIN-T</i>                               |
| <i>TENM4</i>       | teneurin transmembrane protein 4                            | 26011           | <i>TNM4; ODZ4; Doc4; Ten-M4</i>                                   |
| <i>TENM4</i>       | teneurin transmembrane protein 4                            | 26011           | <i>ODZ4</i>                                                       |
| <i>TFB2M</i>       | transcription factor B2, mitochondrial                      | 64216           | <i>Hkp1; mtTFB2</i>                                               |
| <i>THBS2</i>       | thrombospondin 2                                            | 7058            | <i>TSP2</i>                                                       |
| <i>THSD1P1</i>     | thrombospondin, type I, domain containing 1 pseudogene 1    | 374500          | <i>THSD1P</i>                                                     |
| <i>TMEM138</i>     | transmembrane protein 138                                   | 51524           | <i>HSPC196</i>                                                    |
| <i>TMEM18</i>      | transmembrane protein 18                                    | 129787          | None                                                              |
| <i>TMEM200C</i>    | transmembrane protein 200C                                  | 645369          | <i>TTMA</i>                                                       |
| <i>TNS3</i>        | tensin 3                                                    | 64759           | <i>TEM6; TENS1</i>                                                |
| <i>TPTE</i>        | transmembrane phosphatase with tensin homology              | 7179            | <i>PTEN2; CT44</i>                                                |
| <i>TRABD2B</i>     | TraB domain containing 2B                                   | 388630          | <i>TIK12</i>                                                      |
| <i>TRIM41</i>      | tripartite motif containing 41                              | 90933           | <i>RINCK</i>                                                      |
| <i>TRIM61</i>      | tripartite motif containing 61                              | 391712          | <i>RNF35</i>                                                      |
| <i>TRR-CCT5-1</i>  | transfer RNA-Arg (CCT) 5-1                                  | 100189270       | <i>TRNAR23</i>                                                    |
| <i>TSSK6</i>       | testis-specific serine kinase 6                             | 83983           | <i>SSTK; TSSK4; FKS82; CT72</i>                                   |
| <i>TTC34</i>       | tetratricopeptide repeat domain 34                          | 100287898       | None                                                              |
| <i>TTYH3</i>       | tweety family member 3                                      | 80727           | None                                                              |
| <i>UBE2MP1</i>     | ubiquitin-conjugating enzyme E2M pseudogene 1               | 606551          | None                                                              |
| <i>ULBP2</i>       | UL16 binding protein 2                                      | 80328           | <i>RAET1H; ALCAN-alpha; NKG2DL2; N2DL2</i>                        |

| Gene Symbol       | Gene Name                                             | Entrez Gene UID | Synonyms                                                             |
|-------------------|-------------------------------------------------------|-----------------|----------------------------------------------------------------------|
| <i>UNC93B1</i>    | unc-93 homolog B1 (C. elegans)                        | 81622           | <i>UNC93B</i> ; <i>Unc-93B1</i> ; <i>IIAE1</i> ; <i>UNC93</i>        |
| <i>USP29</i>      | ubiquitin specific peptidase 29                       | 57663           | <i>HOM-TES-84/86</i>                                                 |
| <i>WDR24</i>      | WD repeat domain 24                                   | 84219           | <i>C16orf21</i> ; <i>JFP7</i>                                        |
| <i>WDR37</i>      | WD repeat domain 37                                   | 22884           | None                                                                 |
| <i>WNT3A</i>      | wingless-type MMTV integration site family, member 3A | 89780           | None                                                                 |
| <i>WSB1</i>       | WD repeat and SOCS box containing 1                   | 26118           | <i>WSB-1</i> ; <i>SWIP1</i>                                          |
| <i>YBX2</i>       | Y box binding protein 2                               | 51087           | <i>DBPC</i> ; <i>CSDA3</i> ; <i>CONTRIN</i> ; <i>MSY2</i>            |
| <i>ZACN</i>       | zinc activated ligand-gated ion channel               | 353174          | <i>LGICZ1</i> ; <i>L2</i> ; <i>ZAC</i> ; <i>LGICZ</i> ; <i>ZAC1</i>  |
| <i>ZBTB32</i>     | zinc finger and BTB domain containing 32              | 27033           | <i>TZFP</i> ; <i>FAXF</i> ; <i>FAZF</i> ; <i>ZNF538</i> ; <i>Rog</i> |
| <i>ZC3H14</i>     | zinc finger CCCH-type containing 14                   | 79882           | <i>UKp68</i> ; <i>MSUT-2</i> ; <i>SUT2</i> ; <i>NY-REN-37</i>        |
| <i>ZNF248</i>     | zinc finger protein 248                               | 57209           | <i>bA162G10.3</i>                                                    |
| <i>ZNF267</i>     | zinc finger protein 267                               | 10308           | <i>HZF2</i>                                                          |
| <i>ZNF502</i>     | zinc finger protein 502                               | 91392           | None                                                                 |
| <i>ZNF569</i>     | zinc finger protein 569                               | 148266          | <i>ZAP1</i> ; <i>ZNF</i>                                             |
| <i>ZNF570</i>     | zinc finger protein 570                               | 148268          | <i>FLJ30791</i>                                                      |
| <i>ZNF595</i>     | zinc finger protein 595                               | 152687          | None                                                                 |
| <i>ZNF596</i>     | zinc finger protein 596                               | 169270          | None                                                                 |
| <i>ZNF613</i>     | zinc finger protein 613                               | 79898           | None                                                                 |
| <i>ZNF638</i>     | zinc finger protein 638                               | 27332           | <i>MGC26130</i> , <i>NP220</i> , <i>Zfp638</i>                       |
| <i>ZNF718</i>     | zinc finger protein 718                               | 255403          | <i>FLJ90036</i>                                                      |
| <i>ZNF727</i>     | zinc finger protein 727                               | 442319          | <i>ZNF727P</i>                                                       |
| <i>ZNF733P</i>    | zinc finger protein 733, pseudogene                   | 643955          | <i>ZNF733</i>                                                        |
| <i>ZNF735</i>     | zinc finger protein 735                               | 730291          | <i>ZNF735P</i>                                                       |
| <i>ZNF860</i>     | zinc finger protein 860                               | 344787          | None                                                                 |
| <i>ZSWIM4</i>     | zinc finger, SWIM-type containing 4                   | 65249           | None                                                                 |
| <i>ZZEF1</i>      | zinc finger, ZZ-type with EF-hand domain 1            | 23140           | <i>ZZZ4</i>                                                          |
| <i>TRABD2B</i>    | TraB domain containing 2B                             | 388630          | <i>TIK12</i>                                                         |
| <i>TRIM41</i>     | tripartite motif containing 41                        | 90933           | <i>RINCK</i>                                                         |
| <i>TRIM61</i>     | tripartite motif containing 61                        | 391712          | <i>RNF35</i>                                                         |
| <i>TRR-CCT5-1</i> | transfer RNA-Arg (CCT) 5-1                            | 100189270       | <i>TRNAR23</i>                                                       |
| <i>TSSK6</i>      | testis-specific serine kinase 6                       | 83983           | <i>SSTK</i> ; <i>TSSK4</i> ; <i>FKSG82</i> ; <i>CT72</i>             |
| <i>TTC34</i>      | tetratricopeptide repeat domain 34                    | 100287898       | None                                                                 |
| <i>TTYH3</i>      | tweety family member 3                                | 80727           | None                                                                 |
| <i>UBE2MP1</i>    | ubiquitin-conjugating enzyme E2M pseudogene 1         | 606551          | None                                                                 |
| <i>ULBP2</i>      | UL16 binding protein 2                                | 80328           | <i>RAET1H</i> ; <i>ALCAN-alpha</i> ; <i>NKG2DL2</i> ; <i>N2DL2</i>   |
| <i>UNC93B1</i>    | unc-93 homolog B1 (C. elegans)                        | 81622           | <i>UNC93B</i> ; <i>Unc-93B1</i> ; <i>IIAE1</i> ; <i>UNC93</i>        |
| <i>USP29</i>      | ubiquitin specific peptidase 29                       | 57663           | <i>HOM-TES-84/86</i>                                                 |
| <i>WDR24</i>      | WD repeat domain 24                                   | 84219           | <i>C16orf21</i> ; <i>JFP7</i>                                        |
| <i>WDR37</i>      | WD repeat domain 37                                   | 22884           | None                                                                 |
| <i>WNT3A</i>      | wingless-type MMTV integration site family, member 3A | 89780           | None                                                                 |
| <i>WSB1</i>       | WD repeat and SOCS box containing 1                   | 26118           | <i>WSB-1</i> ; <i>SWIP1</i>                                          |
| <i>YBX2</i>       | Y box binding protein 2                               | 51087           | <i>DBPC</i> ; <i>CSDA3</i> ; <i>CONTRIN</i> ; <i>MSY2</i>            |
| <i>ZACN</i>       | zinc activated ligand-gated ion channel               | 353174          | <i>LGICZ1</i> ; <i>L2</i> ; <i>ZAC</i> ; <i>LGICZ</i> ; <i>ZAC1</i>  |
| <i>ZBTB32</i>     | zinc finger and BTB domain containing 32              | 27033           | <i>TZFP</i> ; <i>FAXF</i> ; <i>FAZF</i> ; <i>ZNF538</i> ; <i>Rog</i> |
| <i>ZC3H14</i>     | zinc finger CCCH-type containing 14                   | 79882           | <i>UKp68</i> ; <i>MSUT-2</i> ; <i>SUT2</i> ; <i>NY-REN-37</i>        |
| <i>ZNF248</i>     | zinc finger protein 248                               | 57209           | <i>bA162G10.3</i>                                                    |
| <i>ZNF267</i>     | zinc finger protein 267                               | 10308           | <i>HZF2</i>                                                          |
| <i>ZNF502</i>     | zinc finger protein 502                               | 91392           | None                                                                 |
| <i>ZNF569</i>     | zinc finger protein 569                               | 148266          | <i>ZAP1</i> ; <i>ZNF</i>                                             |
| <i>ZNF570</i>     | zinc finger protein 570                               | 148268          | <i>FLJ30791</i>                                                      |
| <i>ZNF595</i>     | zinc finger protein 595                               | 152687          | None                                                                 |

| <b>Gene Symbol</b> | <b>Gene Name</b>                           | <b>Entrez Gene UID</b> | <b>Synonyms</b>                |
|--------------------|--------------------------------------------|------------------------|--------------------------------|
| <i>ZNF596</i>      | zinc finger protein 596                    | 169270                 | <i>None</i>                    |
| <i>ZNF613</i>      | zinc finger protein 613                    | 79898                  | <i>None</i>                    |
| <i>ZNF638</i>      | zinc finger protein 638                    | 27332                  | <i>MGC26130, NP220, Zfp638</i> |
| <i>ZNF718</i>      | zinc finger protein 718                    | 255403                 | <i>FLJ90036</i>                |
| <i>ZNF727</i>      | zinc finger protein 727                    | 442319                 | <i>ZNF727P</i>                 |
| <i>ZNF733P</i>     | zinc finger protein 733, pseudogene        | 643955                 | <i>ZNF733</i>                  |
| <i>ZNF735</i>      | zinc finger protein 735                    | 730291                 | <i>ZNF735P</i>                 |
| <i>ZNF860</i>      | zinc finger protein 860                    | 344787                 | <i>None</i>                    |
| <i>ZSWIM4</i>      | zinc finger, SWIM-type containing 4        | 65249                  | <i>None</i>                    |
| <i>ZZEF1</i>       | zinc finger, ZZ-type with EF-hand domain 1 | 23140                  | <i>ZZZ4</i>                    |

Additional information provided using Snipper software for nearest genes that were validated in the UCSC database.

Supplementary Table 2. Biological processes considered statistically significant in the DAVID pathway analysis

| <b>Biological process</b>                              | <b>Count</b> | <b>%</b> | <b>Fold Enrichment</b> | <b>P Value</b> | <b>Benjamini</b> |
|--------------------------------------------------------|--------------|----------|------------------------|----------------|------------------|
| cell development                                       | 17           | 8.30     | 2.6                    | 0.0008         | 0.28             |
| embryonic morphogenesis                                | 11           | 5.30     | 3.5                    | 0.0012         | 0.21             |
| pattern specification process                          | 10           | 4.90     | 3.7                    | 0.0016         | 0.19             |
| regulation of multicellular organismal process         | 20           | 9.70     | 2.1                    | 0.0030         | 0.26             |
| cell-cell signaling                                    | 15           | 7.30     | 2.4                    | 0.0032         | 0.22             |
| regionalization                                        | 8            | 3.90     | 4.0                    | 0.0040         | 0.23             |
| forebrain development                                  | 7            | 3.40     | 4.5                    | 0.0046         | 0.23             |
| neural tube development                                | 5            | 2.40     | 7.2                    | 0.0051         | 0.22             |
| embryonic development                                  | 14           | 6.80     | 2.4                    | 0.0052         | 0.21             |
| behavioral interaction between organisms               | 4            | 1.90     | 11.1                   | 0.0053         | 0.19             |
| embryonic development ending in birth or egg hatching  | 10           | 4.90     | 2.9                    | 0.0071         | 0.23             |
| negative regulation of molecular function              | 10           | 4.90     | 2.9                    | 0.0071         | 0.23             |
| formation of primary germ layer                        | 4            | 1.90     | 9.8                    | 0.0077         | 0.23             |
| osteoblast differentiation                             | 4            | 1.90     | 9.3                    | 0.0089         | 0.24             |
| neurological system process                            | 22           | 10.70    | 1.8                    | 0.0110         | 0.26             |
| pallium development                                    | 4            | 1.90     | 8.5                    | 0.0110         | 0.26             |
| ion transport                                          | 16           | 7.80     | 2.0                    | 0.0110         | 0.25             |
| negative regulation of cellular metabolic process      | 15           | 7.30     | 2.0                    | 0.0150         | 0.29             |
| positive regulation of cellular metabolic process      | 17           | 8.30     | 1.9                    | 0.0170         | 0.31             |
| anatomical structure morphogenesis                     | 21           | 10.20    | 1.7                    | 0.0180         | 0.32             |
| negative regulation of cell differentiation            | 7            | 3.40     | 3.2                    | 0.0230         | 0.37             |
| hindbrain development                                  | 4            | 1.90     | 6.5                    | 0.0230         | 0.36             |
| cell differentiation                                   | 26           | 12.60    | 1.5                    | 0.0240         | 0.35             |
| regulation of nitrogen compound metabolic process      | 40           | 19.40    | 1.4                    | 0.0240         | 0.34             |
| positive regulation of metabolic process               | 17           | 8.30     | 1.8                    | 0.0250         | 0.34             |
| tube development                                       | 7            | 3.40     | 3.1                    | 0.0250         | 0.33             |
| regulation of primary metabolic process                | 45           | 21.80    | 1.3                    | 0.0250         | 0.32             |
| response to organic nitrogen                           | 4            | 1.90     | 6.2                    | 0.0260         | 0.32             |
| system development                                     | 34           | 16.50    | 1.4                    | 0.0270         | 0.31             |
| learning or memory                                     | 5            | 2.40     | 4.4                    | 0.0270         | 0.31             |
| organ development                                      | 27           | 13.10    | 1.5                    | 0.0270         | 0.30             |
| negative regulation of metabolic process               | 15           | 7.30     | 1.9                    | 0.0280         | 0.30             |
| telencephalon development                              | 4            | 1.90     | 6.0                    | 0.0280         | 0.30             |
| visual learning                                        | 3            | 1.50     | 10.8                   | 0.0310         | 0.31             |
| oxygen and reactive oxygen species metabolic process   | 4            | 1.90     | 5.8                    | 0.0310         | 0.30             |
| negative regulation of biosynthetic process            | 12           | 5.80     | 2.0                    | 0.0320         | 0.31             |
| negative regulation of macromolecule metabolic process | 14           | 6.80     | 1.9                    | 0.0360         | 0.33             |
| bone development                                       | 5            | 2.40     | 4.0                    | 0.0370         | 0.33             |
| regulation of cellular metabolic process               | 46           | 22.30    | 1.3                    | 0.0370         | 0.32             |
| visual behavior                                        | 3            | 1.50     | 9.4                    | 0.0390         | 0.33             |
| morphogenesis of a branching structure                 | 4            | 1.90     | 5.3                    | 0.0400         | 0.33             |
| tube morphogenesis                                     | 5            | 2.40     | 3.8                    | 0.0410         | 0.33             |
| regulation of biosynthetic process                     | 40           | 19.40    | 1.3                    | 0.0450         | 0.35             |
| regulation of nervous system development               | 6            | 2.90     | 3.0                    | 0.0460         | 0.35             |
| negative regulation of developmental process           | 7            | 3.40     | 2.6                    | 0.0490         | 0.36             |
| regulation of catalytic activity                       | 15           | 7.30     | 1.7                    | 0.0490         | 0.36             |
| defense response                                       | 12           | 5.80     | 1.9                    | 0.0490         | 0.35             |
| <b>Cellular component</b>                              | <b>Count</b> | <b>%</b> | <b>Fold Enrichment</b> | <b>P value</b> | <b>Benjamini</b> |
| postsynaptic membrane                                  | 7            | 3.40     | 5.2                    | 0.0022         | 0.21             |
| plasma membrane part                                   | 33           | 16.00    | 1.5                    | 0.0150         | 0.55             |
| intrinsic to membrane                                  | 68           | 33.00    | 1.2                    | 0.0190         | 0.49             |
| plasma membrane                                        | 50           | 24.30    | 1.3                    | 0.0190         | 0.40             |
| membrane part                                          | 79           | 38.30    | 1.2                    | 0.0200         | 0.35             |
| postsynaptic density                                   | 4            | 1.90     | 5.7                    | 0.0330         | 0.45             |
| membrane                                               | 84           | 40.80    | 1.2                    | 0.0400         | 0.46             |
| <b>Molecular function</b>                              | <b>Count</b> | <b>%</b> | <b>Fold Enrichment</b> | <b>P value</b> | <b>Benjamini</b> |
| passive transmembrane transporter activity             | 12           | 5.80     | 2.9                    | 0.0031         | 0.23             |
| substrate-specific transmembrane transporter activity  | 17           | 8.30     | 2.0                    | 0.0092         | 0.32             |
| receptor activity                                      | 27           | 13.10    | A                      | 0.0460         | 0.73             |
| <b>Pathway</b>                                         | <b>Count</b> | <b>%</b> | <b>Fold Enrichment</b> | <b>P value</b> | <b>Benjamini</b> |
| Neuroactive ligand-receptor interaction                | 9            | 4.40     | 3.3                    | 0.0046         | 0.27             |
| Amyotrophic lateral sclerosis (ALS)                    | 4            | 1.90     | 7.1                    | 0.0170         | 0.45             |
| Long-term potentiation                                 | 4            | 1.90     | 5.5                    | 0.0330         | 0.54             |

Supplementary Table 3. Top results from Ingenuity Pathway Analysis

| <b>Top Canonical Pathways</b>                                                | <b>P value</b>             | <b>Ratio</b>              | <b>Molecules</b>                         |
|------------------------------------------------------------------------------|----------------------------|---------------------------|------------------------------------------|
| Glutamate Receptor Signaling                                                 | 0.002                      | 6.25E-02                  | GRIN2B,GRIN1,GRM8,GNG7                   |
| Gas Signaling                                                                | 0.003                      | 4.42E-02                  | MC3R,DRD5,ADCY8,CRHR1,GNG7               |
| cAMP-mediated signaling                                                      | 0.003                      | 3.14E-02                  | GRM8,MC3R,PTGER3,DRD5,GABBR1,ADCY8,CRHR1 |
| Dopamine-DARPP32 Feedback in cAMP Signaling                                  | 0.004                      | 3.43E-02                  | GRIN2B,GRIN1,KCNJ9,CACNA1C,DRD5,ADCY8    |
| Gai Signaling                                                                | 0.004                      | 4.07E-02                  | GRM8,PTGER3,GABBR1,ADCY8,GNG7            |
| Synaptic Long Term Potentiation                                              | 0.005                      | 3.94E-02                  | GRIN2B,GRIN1,GRM8,CACNA1C,ADCY8          |
| G-Protein Coupled Receptor Signaling                                         | 0.008                      | 2.65E-02                  | GRM8,MC3R,PTGER3,DRD5,GABBR1,ADCY8,CRHR1 |
| IL-1 Signaling                                                               | 0.009                      | 4.26E-02                  | ECSIT,MAP2K3,ADCY8,GNG7                  |
| Amyotrophic Lateral Sclerosis Signaling                                      | 0.014                      | 3.74E-02                  | PRPH,GRIN2B,GRIN1,CACNA1C                |
| Wnt/ $\beta$ -catenin Signaling                                              | 0.016                      | 2.94E-02                  | WNT3A,APC2,FZD5,KREMEN2,DKK1             |
| Colorectal Cancer Metastasis Signaling                                       | 0.018                      | 2.49E-02                  | WNT3A,PTGER3,DCC,FZD5,ADCY8,GNG7         |
| CREB Signaling in Neurons                                                    | 0.019                      | 2.79E-02                  | GRIN2B,GRIN1,GRM8,ADCY8,GNG7             |
| Maturity Onset Diabetes of Young (MODY) Signaling                            | 0.021                      | 7.69E-02                  | FOXA2,CACNA1C                            |
| Basal Cell Carcinoma Signaling                                               | 0.025                      | 4.11E-02                  | WNT3A,APC2,FZD5                          |
| GABA Receptor Signaling                                                      | 0.025                      | 4.11E-02                  | GABRG3,GABBR1,ADCY8                      |
| Role of Wnt/GSK-3 $\beta$ Signaling in the Pathogenesis of Influenza         | 0.031                      | 3.80E-02                  | WNT3A,APC2,FZD5                          |
| Circadian Rhythm Signaling                                                   | 0.036                      | 5.71E-02                  | GRIN2B,GRIN1                             |
| Role of Osteoblasts, Osteoclasts and Chondrocytes in Rheumatoid Arthritis    | 0.046                      | 2.22E-02                  | WNT3A,APC2,FZD5,MAP2K3,DKK1              |
| Transcriptional Regulatory Network in Embryonic Stem Cells                   | 0.047                      | 5.00E-02                  | NEUROG1,PAX6                             |
| TCA Cycle II (Eukaryotic)                                                    | 0.049                      | 4.88E-02                  | OGDH,IDH3B                               |
| Cardiac Hypertrophy Signaling                                                | 0.050                      | 2.16E-02                  | MAP3K10,CACNA1C,MAP2K3,ADCY8,GNG7        |
| <b>Top Upstream Regulators</b>                                               | <b>Molecule Type</b>       | <b>P value of overlap</b> | <b>Target molecules in dataset</b>       |
| EPHB2                                                                        | kinase                     | 1.83E-05                  | GRIN1,GRIN2B,STMN2                       |
| BAIAP2                                                                       | kinase                     | 1.98E-04                  | GRIN1,GRIN2B                             |
| NTRK3                                                                        | kinase                     | 3.94E-04                  | GRIN1,GRIN2B                             |
| GABBR2                                                                       | g-protein coupled receptor | 6.53E-04                  | ARC,GABBR1                               |
| ifenprodil                                                                   | chemical drug              | 6.53E-04                  | GRIN1,GRIN2B                             |
| ganciclovir                                                                  | chemical drug              | 9.74E-04                  | ARC,THBS2                                |
| flupenthixol                                                                 | chemical drug              | 1.36E-03                  | GRIN1,GRIN2B                             |
| aroclor 1221                                                                 | chemical toxicant          | 1.80E-03                  | GRIN2B,MC3R                              |
| ASF1A                                                                        | other                      | 2.30E-03                  | FOXA2,PAX6                               |
| SUZ12                                                                        | enzyme                     | 2.76E-03                  | KCNA1,PAX6,TBX3,TNS3,WNT3A               |
| <b>Top Diseases and Disorders</b>                                            | <b>Minimum P value</b>     | <b># Molecules</b>        |                                          |
| Cancer                                                                       | 2.50E-07                   | 160                       |                                          |
| Neurological Disease                                                         | 2.60E+01                   | 32                        |                                          |
| Connective Tissue Disorders                                                  | 5.33E-04                   | 13                        |                                          |
| Dental Disease                                                               | 5.33E-04                   | 5                         |                                          |
| Developmental Disorder                                                       | 5.33E-04                   | 28                        |                                          |
| <b>Top Molecular and Cellular Functions</b>                                  | <b>Minimum P value</b>     | <b># Molecules</b>        |                                          |
| Cellular growth and proliferation                                            | 7.35E-05                   | 11                        |                                          |
| Cell-to-cell signaling and interaction                                       | 1.13E-04                   | 26                        |                                          |
| Cellular development                                                         | 1.43E-04                   | 31                        |                                          |
| Cellular assembly and organization                                           | 3.89E-04                   | 21                        |                                          |
| Cell signaling                                                               | 3.95E-04                   | 18                        |                                          |
| <b>Top Toxicity Lists</b>                                                    | <b>P value</b>             | <b>Ratio</b>              | <b>Molecules</b>                         |
| Increases Renal Damage                                                       | 2.95E-02                   | 3.85E-02                  | CFB,RGCC,MAP2K3                          |
| Decreases Permeability Transition of Mitochondria and Mitochondrial Membrane | 5.89E-02                   | 1.43E-01                  | OGDH                                     |
| Mitochondrial Dysfunction                                                    | 6.61E-02                   | 2.27E-02                  | FIS1,ATP5D,OGDH,NDUFA13                  |
| Glutathione Depletion - CYP Induction and Reactive Metabolites               | 9.77E-02                   | 8.33E-02                  | CFB                                      |
| PPAR $\alpha$ /RXR $\alpha$ Activation                                       | 2.09E-01                   | 1.64E-02                  | MAP2K3,ADCY8,MED24                       |

Supplementary Table 4. Functional annotation results from GORILLA

| GO term                                                                | Description                             | P value  | FDR q-value | Enrichment (N, B, n, b)* | Genes                                                                                                       |
|------------------------------------------------------------------------|-----------------------------------------|----------|-------------|--------------------------|-------------------------------------------------------------------------------------------------------------|
| GO:0007268                                                             | synaptic transmission                   | 1.24E-05 | 1.61E-01    | 3.55 (18004,443,183,16)  | GNG7 - guanine nucleotide binding protein (g protein), gamma 7                                              |
|                                                                        |                                         |          |             |                          | GRIN1 - glutamate receptor, ionotropic, n-methyl d-aspartate 1                                              |
|                                                                        |                                         |          |             |                          | CACNG2 - calcium channel, voltage-dependent, gamma subunit 2                                                |
|                                                                        |                                         |          |             |                          | KCNA1 - potassium voltage-gated channel, shaker-related subfamily, member 1 (episodic ataxia with myokymia) |
|                                                                        |                                         |          |             |                          | GRIN2B - glutamate receptor, ionotropic, n-methyl d-aspartate 2b                                            |
|                                                                        |                                         |          |             |                          | GABBR1 - gamma-aminobutyric acid (gaba) b receptor, 1                                                       |
|                                                                        |                                         |          |             |                          | DRD5 - dopamine receptor d5                                                                                 |
|                                                                        |                                         |          |             |                          | CPLX1 - complexin 1                                                                                         |
|                                                                        |                                         |          |             |                          | KCNJ9 - potassium inwardly-rectifying channel, subfamily j, member 9                                        |
|                                                                        |                                         |          |             |                          | SYT5 - synaptotagmin v                                                                                      |
|                                                                        |                                         |          |             |                          | GABRG3 - gamma-aminobutyric acid (gaba) a receptor, gamma 3                                                 |
|                                                                        |                                         |          |             |                          | KCNV1 - potassium channel, subfamily v, member 1                                                            |
|                                                                        |                                         |          |             |                          | PANX2 - pannexin 2                                                                                          |
|                                                                        |                                         |          |             |                          | ADCY8 - adenylate cyclase 8 (brain)                                                                         |
|                                                                        |                                         |          |             |                          | PCDHB6 - protocadherin beta 6                                                                               |
| CACNA1C - calcium channel, voltage-dependent, I type, alpha 1c subunit |                                         |          |             |                          |                                                                                                             |
| GO:0007267                                                             | cell-cell signaling                     | 4.67E-05 | 3.04E-01    | 2.73 (18004,721,183,20)  | NTF4 - neurotrophin 4                                                                                       |
|                                                                        |                                         |          |             |                          | CACNG2 - calcium channel, voltage-dependent, gamma subunit 2                                                |
|                                                                        |                                         |          |             |                          | GNG7 - guanine nucleotide binding protein (g protein), gamma 7                                              |
|                                                                        |                                         |          |             |                          | GRIN1 - glutamate receptor, ionotropic, n-methyl d-aspartate 1                                              |
|                                                                        |                                         |          |             |                          | KCNA1 - potassium voltage-gated channel, shaker-related subfamily, member 1 (episodic ataxia with myokymia) |
|                                                                        |                                         |          |             |                          | GRIN2B - glutamate receptor, ionotropic, n-methyl d-aspartate 2b                                            |
|                                                                        |                                         |          |             |                          | GABBR1 - gamma-aminobutyric acid (gaba) b receptor, 1                                                       |
|                                                                        |                                         |          |             |                          | DRD5 - dopamine receptor d5                                                                                 |
|                                                                        |                                         |          |             |                          | CPLX1 - complexin 1                                                                                         |
|                                                                        |                                         |          |             |                          | GJA3 - gap junction protein, alpha 3, 46kda                                                                 |
|                                                                        |                                         |          |             |                          | KCNJ9 - potassium inwardly-rectifying channel, subfamily j, member 9                                        |
|                                                                        |                                         |          |             |                          | SYT5 - synaptotagmin v                                                                                      |
|                                                                        |                                         |          |             |                          | GABRG3 - gamma-aminobutyric acid (gaba) a receptor, gamma 3                                                 |
|                                                                        |                                         |          |             |                          | KCNV1 - potassium channel, subfamily v, member 1                                                            |
|                                                                        |                                         |          |             |                          | PANX2 - pannexin 2                                                                                          |
| PTHLH - parathyroid hormone-like hormone                               |                                         |          |             |                          |                                                                                                             |
| ADCY8 - adenylate cyclase 8 (brain)                                    |                                         |          |             |                          |                                                                                                             |
| PCDHB6 - protocadherin beta 6                                          |                                         |          |             |                          |                                                                                                             |
| CACNA1C - calcium channel, voltage-dependent, I type, alpha 1c subunit |                                         |          |             |                          |                                                                                                             |
| IHH - indian hedgehog                                                  |                                         |          |             |                          |                                                                                                             |
| GO:0030817                                                             | regulation of cAMP biosynthetic process | 6.34E-05 | 2.75E-01    | 7.03 (18004,98,183,7)    | GRM8 - glutamate receptor, metabotropic 8                                                                   |
|                                                                        |                                         |          |             |                          | GNG7 - guanine nucleotide binding protein (g protein), gamma 7                                              |
|                                                                        |                                         |          |             |                          | CRHR1 - corticotropin releasing hormone receptor 1                                                          |
|                                                                        |                                         |          |             |                          | GABBR1 - gamma-aminobutyric acid (gaba) b receptor, 1                                                       |
|                                                                        |                                         |          |             |                          | DRD5 - dopamine receptor d5                                                                                 |
|                                                                        |                                         |          |             |                          | PTHLH - parathyroid hormone-like hormone                                                                    |
| GO:0044708                                                             | single-organism behavior                | 6.43E-05 | 2.09E-01    | 3.64 (18004,351,183,13)  | MC3R - melanocortin 3 receptor                                                                              |
|                                                                        |                                         |          |             |                          | GNG7 - guanine nucleotide binding protein (g protein), gamma 7                                              |
|                                                                        |                                         |          |             |                          | NTF4 - neurotrophin 4                                                                                       |

| GO term    | Description               | P value  | FDR q-value | Enrichment (N, B, n, b)* | Genes                                                                                                       |
|------------|---------------------------|----------|-------------|--------------------------|-------------------------------------------------------------------------------------------------------------|
|            |                           |          |             |                          | GRIN1 - glutamate receptor, ionotropic, n-methyl d-aspartate 1                                              |
|            |                           |          |             |                          | GRIN2B - glutamate receptor, ionotropic, n-methyl d-aspartate 2b                                            |
|            |                           |          |             |                          | DRD5 - dopamine receptor d5                                                                                 |
|            |                           |          |             |                          | RNF180 - ring finger protein 180                                                                            |
|            |                           |          |             |                          | CRHR1 - corticotropin releasing hormone receptor 1                                                          |
|            |                           |          |             |                          | ADCY8 - adenylyate cyclase 8 (brain)                                                                        |
|            |                           |          |             |                          | ARC - activity-regulated cytoskeleton-associated protein                                                    |
|            |                           |          |             |                          | NR2E1 - nuclear receptor subfamily 2, group e, member 1                                                     |
|            |                           |          |             |                          | CACNA1C - calcium channel, voltage-dependent, I type, alpha 1c subunit                                      |
|            |                           |          |             |                          | CUX2 - cut-like homeobox 2                                                                                  |
|            |                           |          |             |                          | FOXA2 - forkhead box a2                                                                                     |
| GO:0044700 | single organism signaling | 8.04E-05 | 2.09E-01    | 2.62 (18004,750,183,20)  | NTF4 - neurotrophin 4                                                                                       |
|            |                           |          |             |                          | CACNG2 - calcium channel, voltage-dependent, gamma subunit 2                                                |
|            |                           |          |             |                          | GNG7 - guanine nucleotide binding protein (g protein), gamma 7                                              |
|            |                           |          |             |                          | GRIN1 - glutamate receptor, ionotropic, n-methyl d-aspartate 1                                              |
|            |                           |          |             |                          | KCNA1 - potassium voltage-gated channel, shaker-related subfamily, member 1 (episodic ataxia with myokymia) |
|            |                           |          |             |                          | GRIN2B - glutamate receptor, ionotropic, n-methyl d-aspartate 2b                                            |
|            |                           |          |             |                          | GABBR1 - gamma-aminobutyric acid (gaba) b receptor, 1                                                       |
|            |                           |          |             |                          | DRD5 - dopamine receptor d5                                                                                 |
|            |                           |          |             |                          | CPLX1 - complexin 1                                                                                         |
|            |                           |          |             |                          | GJA3 - gap junction protein, alpha 3, 46kda                                                                 |
|            |                           |          |             |                          | KCNJ9 - potassium inwardly-rectifying channel, subfamily j, member 9                                        |
|            |                           |          |             |                          | SYT5 - synaptotagmin v                                                                                      |
|            |                           |          |             |                          | GABRG3 - gamma-aminobutyric acid (gaba) a receptor, gamma 3                                                 |
|            |                           |          |             |                          | KCNV1 - potassium channel, subfamily v, member 1                                                            |
|            |                           |          |             |                          | PANX2 - pannexin 2                                                                                          |
|            |                           |          |             |                          | PTHLH - parathyroid hormone-like hormone                                                                    |
|            |                           |          |             |                          | ADCY8 - adenylyate cyclase 8 (brain)                                                                        |
|            |                           |          |             |                          | PCDHB6 - protocadherin beta 6                                                                               |
|            |                           |          |             |                          | CACNA1C - calcium channel, voltage-dependent, I type, alpha 1c subunit                                      |
|            |                           |          |             |                          | IHH - indian hedgehog                                                                                       |
| GO:0023052 | signaling                 | 8.19E-05 | 1.78E-01    | 2.62 (18004,751,183,20)  | NTF4 - neurotrophin 4                                                                                       |
|            |                           |          |             |                          | CACNG2 - calcium channel, voltage-dependent, gamma subunit 2                                                |
|            |                           |          |             |                          | GNG7 - guanine nucleotide binding protein (g protein), gamma 7                                              |
|            |                           |          |             |                          | GRIN1 - glutamate receptor, ionotropic, n-methyl d-aspartate 1                                              |
|            |                           |          |             |                          | KCNA1 - potassium voltage-gated channel, shaker-related subfamily, member 1 (episodic ataxia with myokymia) |
|            |                           |          |             |                          | GRIN2B - glutamate receptor, ionotropic, n-methyl d-aspartate 2b                                            |
|            |                           |          |             |                          | GABBR1 - gamma-aminobutyric acid (gaba) b receptor, 1                                                       |
|            |                           |          |             |                          | DRD5 - dopamine receptor d5                                                                                 |
|            |                           |          |             |                          | CPLX1 - complexin 1                                                                                         |
|            |                           |          |             |                          | GJA3 - gap junction protein, alpha 3, 46kda                                                                 |
|            |                           |          |             |                          | KCNJ9 - potassium inwardly-rectifying channel, subfamily j, member 9                                        |
|            |                           |          |             |                          | SYT5 - synaptotagmin v                                                                                      |
|            |                           |          |             |                          | GABRG3 - gamma-aminobutyric acid (gaba) a receptor, gamma 3                                                 |
|            |                           |          |             |                          | KCNV1 - potassium channel, subfamily v, member 1                                                            |
|            |                           |          |             |                          | PANX2 - pannexin 2                                                                                          |
|            |                           |          |             |                          | PTHLH - parathyroid hormone-like hormone                                                                    |
|            |                           |          |             |                          | ADCY8 - adenylyate cyclase 8 (brain)                                                                        |
|            |                           |          |             |                          | PCDHB6 - protocadherin beta 6                                                                               |
|            |                           |          |             |                          | CACNA1C - calcium channel, voltage-dependent, I type, alpha 1c subunit                                      |

| GO term    | Description                                           | P value  | FDR q-value | Enrichment (N, B, n, b)* | Genes                                                                                                                                                                                                                                                                                                                                                                                                                                                                                                                                                                                                                                                                                                                                                                                                                                                                                                                                                                                                                                                                                                                                                         |
|------------|-------------------------------------------------------|----------|-------------|--------------------------|---------------------------------------------------------------------------------------------------------------------------------------------------------------------------------------------------------------------------------------------------------------------------------------------------------------------------------------------------------------------------------------------------------------------------------------------------------------------------------------------------------------------------------------------------------------------------------------------------------------------------------------------------------------------------------------------------------------------------------------------------------------------------------------------------------------------------------------------------------------------------------------------------------------------------------------------------------------------------------------------------------------------------------------------------------------------------------------------------------------------------------------------------------------|
|            |                                                       |          |             |                          | IHH - indian hedgehog                                                                                                                                                                                                                                                                                                                                                                                                                                                                                                                                                                                                                                                                                                                                                                                                                                                                                                                                                                                                                                                                                                                                         |
| GO:0051960 | regulation of nervous system development              | 8.26E-05 | 1.54E-01    | 2.91 (18004,575,183,17)  | GRIN1 - glutamate receptor, ionotropic, n-methyl d-aspartate 1<br>NTF4 - neurotrophin 4<br>PAX6 - paired box 6<br>SARM1 - sterile alpha and tir motif containing 1<br>HES3 - hairy and enhancer of split 3 (drosophila)<br>CFL1 - cofilin 1 (non-muscle)<br>WNT3A - wingless-type mmtv integration site family, member 3a<br>THBS2 - thrombospondin 2<br>OPCML - opioid binding protein/cell adhesion molecule-like<br>TENM4 - teneurin transmembrane protein 4<br>CBLN2 - cerebellin 2 precursor<br>NR2E1 - nuclear receptor subfamily 2, group e, member 1<br>DCC - deleted in colorectal carcinoma<br>NEUROG1 - neurogenin 1<br>CUX2 - cut-like homeobox 2<br>STMN2 - stathmin-like 2<br>FOXA2 - forkhead box a2                                                                                                                                                                                                                                                                                                                                                                                                                                           |
| GO:2000543 | positive regulation of gastrulation                   | 8.30E-05 | 1.35E-01    | 32.79 (18004,9,183,3)    | WNT3A - wingless-type mmtv integration site family, member 3a<br>TENM4 - teneurin transmembrane protein 4<br>FOXA2 - forkhead box a2                                                                                                                                                                                                                                                                                                                                                                                                                                                                                                                                                                                                                                                                                                                                                                                                                                                                                                                                                                                                                          |
| GO:0007154 | cell communication                                    | 1.11E-04 | 1.61E-01    | 2.42 (18004,893,183,22)  | NTF4 - neurotrophin 4<br>GNG7 - guanine nucleotide binding protein (g protein), gamma 7<br>KREMEN2 - kringle containing transmembrane protein 2<br>GRIN1 - glutamate receptor, ionotropic, n-methyl d-aspartate 1<br>CACNG2 - calcium channel, voltage-dependent, gamma subunit 2<br>KCNA1 - potassium voltage-gated channel, shaker-related subfamily, member 1 (episodic ataxia with myokymia)<br>GRIN2B - glutamate receptor, ionotropic, n-methyl d-aspartate 2b<br>GABBR1 - gamma-aminobutyric acid (gaba) b receptor, 1<br>DRD5 - dopamine receptor d5<br>CPLX1 - complexin 1<br>GJA3 - gap junction protein, alpha 3, 46kda<br>KCNJ9 - potassium inwardly-rectifying channel, subfamily j, member 9<br>SYT5 - synaptotagmin v<br>GABRG3 - gamma-aminobutyric acid (gaba) a receptor, gamma 3<br>PCSK9 - proprotein convertase subtilisin/kexin type 9<br>PANX2 - pannexin 2<br>KCNV1 - potassium channel, subfamily v, member 1<br>ADCY8 - adenylate cyclase 8 (brain)<br>PTHLH - parathyroid hormone-like hormone<br>PCDHB6 - protocadherin beta 6<br>CACNA1C - calcium channel, voltage-dependent, l type, alpha 1c subunit<br>IHH - indian hedgehog |
| GO:2000047 | regulation of cell-cell adhesion mediated by cadherin | 1.18E-04 | 1.53E-01    | 29.51 (18004,10,183,3)   | RGCC - regulator of cell cycle<br>WNT3A - wingless-type mmtv integration site family, member 3a<br>FOXA2 - forkhead box a2                                                                                                                                                                                                                                                                                                                                                                                                                                                                                                                                                                                                                                                                                                                                                                                                                                                                                                                                                                                                                                    |
| GO:0042596 | fear response                                         | 1.51E-04 | 1.79E-01    | 14.58 (18004,27,183,4)   |                                                                                                                                                                                                                                                                                                                                                                                                                                                                                                                                                                                                                                                                                                                                                                                                                                                                                                                                                                                                                                                                                                                                                               |



| GO term    | Description                                          | P value  | FDR q-value | Enrichment (N, B, n, b)* | Genes                                                                                                                                                                                                                                                                                                                                                                                                                                                       |
|------------|------------------------------------------------------|----------|-------------|--------------------------|-------------------------------------------------------------------------------------------------------------------------------------------------------------------------------------------------------------------------------------------------------------------------------------------------------------------------------------------------------------------------------------------------------------------------------------------------------------|
|            |                                                      |          |             |                          | CRHR1 - corticotropin releasing hormone receptor 1<br>GNG7 - guanine nucleotide binding protein (g protein), gamma 7<br>GRIN2B - glutamate receptor, ionotropic, n-methyl d-aspartate 2b<br>NR2E1 - nuclear receptor subfamily 2, group e, member 1                                                                                                                                                                                                         |
| GO:0030814 | regulation of cAMP metabolic process                 | 1.56E-04 | 1.69E-01    | 6.09 (18004,113,183,7)   | GRM8 - glutamate receptor, metabotropic 8<br>GNG7 - guanine nucleotide binding protein (g protein), gamma 7<br>CRHR1 - corticotropin releasing hormone receptor 1<br>GABBR1 - gamma-aminobutyric acid (gaba) b receptor, 1<br>DRD5 - dopamine receptor d5<br>PTHLH - parathyroid hormone-like hormone<br>MC3R - melanocortin 3 receptor                                                                                                                     |
| GO:0048505 | regulation of timing of cell differentiation         | 1.61E-04 | 1.61E-01    | 26.83 (18004,11,183,3)   | PAX6 - paired box 6<br>NR2E1 - nuclear receptor subfamily 2, group e, member 1<br>HES3 - hairy and enhancer of split 3 (drosophila)                                                                                                                                                                                                                                                                                                                         |
| GO:0007611 | learning or memory                                   | 1.62E-04 | 1.51E-01    | 4.59 (18004,193,183,9)   | GRIN1 - glutamate receptor, ionotropic, n-methyl d-aspartate 1<br>NTF4 - neurotrophin 4<br>CRHR1 - corticotropin releasing hormone receptor 1<br>GRIN2B - glutamate receptor, ionotropic, n-methyl d-aspartate 2b<br>DRD5 - dopamine receptor d5<br>ARC - activity-regulated cytoskeleton-associated protein<br>ADCY8 - adenylate cyclase 8 (brain)<br>CUX2 - cut-like homeobox 2<br>CACNA1C - calcium channel, voltage-dependent, I type, alpha 1c subunit |
| GO:0030802 | regulation of cyclic nucleotide biosynthetic process | 1.83E-04 | 1.59E-01    | 5.94 (18004,116,183,7)   | GRM8 - glutamate receptor, metabotropic 8<br>GNG7 - guanine nucleotide binding protein (g protein), gamma 7<br>CRHR1 - corticotropin releasing hormone receptor 1<br>GABBR1 - gamma-aminobutyric acid (gaba) b receptor, 1<br>DRD5 - dopamine receptor d5<br>PTHLH - parathyroid hormone-like hormone<br>MC3R - melanocortin 3 receptor                                                                                                                     |
| GO:0040034 | regulation of development, heterochronic             | 2.12E-04 | 1.73E-01    | 24.60 (18004,12,183,3)   | PAX6 - paired box 6<br>NR2E1 - nuclear receptor subfamily 2, group e, member 1<br>HES3 - hairy and enhancer of split 3 (drosophila)                                                                                                                                                                                                                                                                                                                         |
| GO:1900371 | regulation of purine nucleotide biosynthetic process | 2.15E-04 | 1.65E-01    | 5.79 (18004,119,183,7)   | GRM8 - glutamate receptor, metabotropic 8<br>GNG7 - guanine nucleotide binding protein (g protein), gamma 7<br>CRHR1 - corticotropin releasing hormone receptor 1<br>GABBR1 - gamma-aminobutyric acid (gaba) b receptor, 1<br>DRD5 - dopamine receptor d5<br>PTHLH - parathyroid hormone-like hormone<br>MC3R - melanocortin 3 receptor                                                                                                                     |
| GO:0030808 | regulation of nucleotide biosynthetic process        | 2.15E-04 | 1.55E-01    | 5.79 (18004,119,183,7)   | GRM8 - glutamate receptor, metabotropic 8<br>GNG7 - guanine nucleotide binding protein (g protein), gamma 7<br>CRHR1 - corticotropin releasing hormone receptor 1<br>GABBR1 - gamma-aminobutyric acid (gaba) b receptor, 1<br>DRD5 - dopamine receptor d5                                                                                                                                                                                                   |

| GO term    | Description                                 | P value  | FDR q-value | Enrichment (N, B, n, b)* | Genes                                                                                                                                                                                                                                                                                                                                                                                                                                                                                                                                                                                                                                                 |
|------------|---------------------------------------------|----------|-------------|--------------------------|-------------------------------------------------------------------------------------------------------------------------------------------------------------------------------------------------------------------------------------------------------------------------------------------------------------------------------------------------------------------------------------------------------------------------------------------------------------------------------------------------------------------------------------------------------------------------------------------------------------------------------------------------------|
|            |                                             |          |             |                          | PTHLH - parathyroid hormone-like hormone<br>MC3R - melanocortin 3 receptor                                                                                                                                                                                                                                                                                                                                                                                                                                                                                                                                                                            |
| GO:0050767 | regulation of neurogenesis                  | 2.62E-04 | 1.80E-01    | 2.86 (18004,516,183,15)  | GRIN1 - glutamate receptor, ionotropic, n-methyl d-aspartate 1<br>NTF4 - neurotrophin 4<br>PAX6 - paired box 6<br>SARM1 - sterile alpha and tir motif containing 1<br>HES3 - hairy and enhancer of split 3 (drosophila)<br>CFL1 - cofilin 1 (non-muscle)<br>WNT3A - wingless-type mmtv integration site family, member 3a<br>OPCML - opioid binding protein/cell adhesion molecule-like<br>TENM4 - teneurin transmembrane protein 4<br>NR2E1 - nuclear receptor subfamily 2, group e, member 1<br>DCC - deleted in colorectal carcinoma<br>NEUROG1 - neurogenin 1<br>CUX2 - cut-like homeobox 2<br>STMN2 - stathmin-like 2<br>FOXA2 - forkhead box a2 |
| GO:0010470 | regulation of gastrulation                  | 2.62E-04 | 1.71E-01    | 12.69 (18004,31,183,4)   | WNT3A - wingless-type mmtv integration site family, member 3a<br>DKK1 - dickkopf wnt signaling pathway inhibitor 1<br>TENM4 - teneurin transmembrane protein 4<br>FOXA2 - forkhead box a2                                                                                                                                                                                                                                                                                                                                                                                                                                                             |
| GO:0010455 | positive regulation of cell fate commitment | 2.74E-04 | 1.70E-01    | 22.70 (18004,13,183,3)   | WNT3A - wingless-type mmtv integration site family, member 3a<br>DKK1 - dickkopf wnt signaling pathway inhibitor 1<br>PAX6 - paired box 6                                                                                                                                                                                                                                                                                                                                                                                                                                                                                                             |
| GO:0050773 | regulation of dendrite development          | 2.76E-04 | 1.63E-01    | 6.71 (18004,88,183,6)    | GRIN1 - glutamate receptor, ionotropic, n-methyl d-aspartate 1<br>DCC - deleted in colorectal carcinoma<br>NR2E1 - nuclear receptor subfamily 2, group e, member 1<br>SARM1 - sterile alpha and tir motif containing 1<br>CUX2 - cut-like homeobox 2<br>CFL1 - cofilin 1 (non-muscle)                                                                                                                                                                                                                                                                                                                                                                 |
| GO:0048814 | regulation of dendrite morphogenesis        | 2.80E-04 | 1.59E-01    | 8.63 (18004,57,183,5)    | GRIN1 - glutamate receptor, ionotropic, n-methyl d-aspartate 1<br>NR2E1 - nuclear receptor subfamily 2, group e, member 1<br>SARM1 - sterile alpha and tir motif containing 1<br>CUX2 - cut-like homeobox 2<br>CFL1 - cofilin 1 (non-muscle)                                                                                                                                                                                                                                                                                                                                                                                                          |
| GO:0045664 | regulation of neuron differentiation        | 2.91E-04 | 1.58E-01    | 3.13 (18004,409,183,13)  | GRIN1 - glutamate receptor, ionotropic, n-methyl d-aspartate 1<br>NTF4 - neurotrophin 4<br>PAX6 - paired box 6<br>SARM1 - sterile alpha and tir motif containing 1<br>HES3 - hairy and enhancer of split 3 (drosophila)<br>CFL1 - cofilin 1 (non-muscle)<br>WNT3A - wingless-type mmtv integration site family, member 3a<br>DCC - deleted in colorectal carcinoma<br>NR2E1 - nuclear receptor subfamily 2, group e, member 1<br>CUX2 - cut-like homeobox 2<br>NEUROG1 - neurogenin 1                                                                                                                                                                 |

| GO term    | Description                                       | P value  | FDR q-value | Enrichment (N, B, n, b)* | Genes                                                                                                                                                                                                                                                                                                                                                                                                                                                       |
|------------|---------------------------------------------------|----------|-------------|--------------------------|-------------------------------------------------------------------------------------------------------------------------------------------------------------------------------------------------------------------------------------------------------------------------------------------------------------------------------------------------------------------------------------------------------------------------------------------------------------|
|            |                                                   |          |             |                          | STMN2 - stathmin-like 2<br>FOXA2 - forkhead box a2                                                                                                                                                                                                                                                                                                                                                                                                          |
| GO:0007613 | memory                                            | 3.31E-04 | 1.73E-01    | 6.49 (18004,91,183,6)    | GRIN1 - glutamate receptor, ionotropic, n-methyl d-aspartate 1<br>NTF4 - neurotrophin 4<br>CRHR1 - corticotropin releasing hormone receptor 1<br>GRIN2B - glutamate receptor, ionotropic, n-methyl d-aspartate 2b<br>ADCY8 - adenylate cyclase 8 (brain)<br>CUX2 - cut-like homeobox 2                                                                                                                                                                      |
| GO:0050890 | cognition                                         | 4.57E-04 | 2.29E-01    | 3.99 (18004,222,183,9)   | GRIN1 - glutamate receptor, ionotropic, n-methyl d-aspartate 1<br>NTF4 - neurotrophin 4<br>CRHR1 - corticotropin releasing hormone receptor 1<br>GRIN2B - glutamate receptor, ionotropic, n-methyl d-aspartate 2b<br>DRD5 - dopamine receptor d5<br>ARC - activity-regulated cytoskeleton-associated protein<br>ADCY8 - adenylate cyclase 8 (brain)<br>CUX2 - cut-like homeobox 2<br>CACNA1C - calcium channel, voltage-dependent, I type, alpha 1c subunit |
| GO:0030799 | regulation of cyclic nucleotide metabolic process | 4.64E-04 | 2.24E-01    | 5.10 (18004,135,183,7)   | GRM8 - glutamate receptor, metabotropic 8<br>GNG7 - guanine nucleotide binding protein (g protein), gamma 7<br>CRHR1 - corticotropin releasing hormone receptor 1<br>GABBR1 - gamma-aminobutyric acid (gaba) b receptor, 1<br>DRD5 - dopamine receptor d5<br>PTH1LH - parathyroid hormone-like hormone<br>MC3R - melanocortin 3 receptor                                                                                                                    |
| GO:2000648 | positive regulation of stem cell proliferation    | 4.82E-04 | 2.24E-01    | 7.69 (18004,64,183,5)    | TBX3 - t-box 3<br>PAX6 - paired box 6<br>NR2E1 - nuclear receptor subfamily 2, group e, member 1<br>IHH - indian hedgehog<br>CHRD - chordin                                                                                                                                                                                                                                                                                                                 |
| GO:0042660 | positive regulation of cell fate specification    | 6.08E-04 | 2.73E-01    | 49.19 (18004,4,183,2)    | WNT3A - wingless-type mmtv integration site family, member 3a<br>PAX6 - paired box 6                                                                                                                                                                                                                                                                                                                                                                        |
| GO:0090381 | regulation of heart induction                     | 6.08E-04 | 2.64E-01    | 49.19 (18004,4,183,2)    | WNT3A - wingless-type mmtv integration site family, member 3a<br>DKK1 - dickkopf wnt signaling pathway inhibitor 1                                                                                                                                                                                                                                                                                                                                          |
| GO:0051963 | regulation of synapse assembly                    | 6.43E-04 | 2.70E-01    | 10.09 (18004,39,183,4)   | GRIN1 - glutamate receptor, ionotropic, n-methyl d-aspartate 1<br>THBS2 - thrombospondin 2<br>CBLN2 - cerebellin 2 precursor<br>CUX2 - cut-like homeobox 2                                                                                                                                                                                                                                                                                                  |
| GO:0048598 | embryonic morphogenesis                           | 6.93E-04 | 2.82E-01    | 3.01 (18004,392,183,12)  | TBX3 - t-box 3<br>WNT3A - wingless-type mmtv integration site family, member 3a<br>FZD5 - frizzled family receptor 5<br>DKK1 - dickkopf wnt signaling pathway inhibitor 1<br>PAX6 - paired box 6<br>TENM4 - teneurin transmembrane protein 4                                                                                                                                                                                                                |

| GO term    | Description                           | P value  | FDR q-value | Enrichment (N, B, n, b)* | Genes                                                                                                                                                                                                                                                                                                                                                                                                                                                                                                                                                                                                                                                                                                                                                                                                                                                                                                                                                                                                                                                                                                                                                                                                                                                                                                                                                                                                                                   |
|------------|---------------------------------------|----------|-------------|--------------------------|-----------------------------------------------------------------------------------------------------------------------------------------------------------------------------------------------------------------------------------------------------------------------------------------------------------------------------------------------------------------------------------------------------------------------------------------------------------------------------------------------------------------------------------------------------------------------------------------------------------------------------------------------------------------------------------------------------------------------------------------------------------------------------------------------------------------------------------------------------------------------------------------------------------------------------------------------------------------------------------------------------------------------------------------------------------------------------------------------------------------------------------------------------------------------------------------------------------------------------------------------------------------------------------------------------------------------------------------------------------------------------------------------------------------------------------------|
|            |                                       |          |             |                          | ALX3 - alx homeobox 3<br>NEUROG1 - neurogenin 1<br>HES3 - hairy and enhancer of split 3 (drosophila)<br>IHH - indian hedgehog<br>CFL1 - cofilin 1 (non-muscle)<br>CHRD - chordin                                                                                                                                                                                                                                                                                                                                                                                                                                                                                                                                                                                                                                                                                                                                                                                                                                                                                                                                                                                                                                                                                                                                                                                                                                                        |
| GO:0055085 | transmembrane transport               | 7.07E-04 | 2.79E-01    | 2.08 (18004,1090,183,23) | GRIN1 - glutamate receptor, ionotropic, n-methyl d-aspartate 1<br>CACNG2 - calcium channel, voltage-dependent, gamma subunit 2<br>GRIN2B - glutamate receptor, ionotropic, n-methyl d-aspartate 2b<br>KCNA1 - potassium voltage-gated channel, shaker-related subfamily, member 1 (episodic ataxia with myokymia)<br>SLC39A3 - solute carrier family 39 (zinc transporter), member 3<br>OCA2 - oculocutaneous albinism ii<br>SLC16A12 - solute carrier family 16, member 12<br>RASA3 - ras p21 protein activator 3<br>NDUFA13 - nadh dehydrogenase (ubiquinone) 1 alpha subcomplex, 13<br>TTYH3 - tweety homolog 3 (drosophila)<br>GJA3 - gap junction protein, alpha 3, 46kda<br>KCNJ9 - potassium inwardly-rectifying channel, subfamily j, member 9<br>GABRG3 - gamma-aminobutyric acid (gaba) a receptor, gamma 3<br>ATP5D - atp synthase, h+ transporting, mitochondrial f1 complex, delta subunit<br>ZACN - zinc activated ligand-gated ion channel<br>ATP8B3 - atpase, aminophospholipid transporter, class i, type 8b, member 3<br>PANX2 - pannexin 2<br>KCNV1 - potassium channel, subfamily v, member 1<br>ADCY8 - adenylate cyclase 8 (brain)<br>SLC39A7 - solute carrier family 39 (zinc transporter), member 7<br>CACNA1C - calcium channel, voltage-dependent, l type, alpha 1c subunit<br>TPTE - transmembrane phosphatase with tensin homology<br>SLCO2B1 - solute carrier organic anion transporter family, member 2b1 |
| GO:0042659 | regulation of cell fate specification | 7.53E-04 | 2.89E-01    | 16.40 (18004,18,183,3)   | WNT3A - wingless-type mmtv integration site family, member 3a<br>DKK1 - dickkopf wnt signaling pathway inhibitor 1<br>PAX6 - paired box 6                                                                                                                                                                                                                                                                                                                                                                                                                                                                                                                                                                                                                                                                                                                                                                                                                                                                                                                                                                                                                                                                                                                                                                                                                                                                                               |

Enrichment (N, B, n, b) is defined as follows: N : Total number of genes; B: Total number of genes associated with a specific GO term; n: Number of genes in the top of the user's input list or in the target set when appropriate; b: Number of genes in the intersection; Enrichment = (b/n) / (B/N).

Supplementary Table 5. Associations (false discovery rate corrected P value < 0.1) between gene expression in white blood cells and methylation in a cohort of older adults (Rotterdam Study) for CpGs significantly associated with maternal plasma folate in newborns in the meta-analysis

| Probe ID     | Expressed Gene     | CpG        | Coef   | SE   | P        | FDR      |
|--------------|--------------------|------------|--------|------|----------|----------|
| ILMN_1774256 | <i>PRSS21</i>      | cg01232511 | -2.53  | 0.22 | 7.86E-28 | 2.05E-24 |
| ILMN_1774256 | <i>PRSS21</i>      | cg02296564 | -3.89  | 0.35 | 1.38E-26 | 1.80E-23 |
| ILMN_1774256 | <i>PRSS21</i>      | cg05635274 | -5.06  | 0.47 | 4.06E-25 | 3.52E-22 |
| ILMN_1774256 | <i>PRSS21</i>      | cg22730830 | -2.74  | 0.26 | 6.30E-25 | 4.10E-22 |
| ILMN_1786426 | <i>IGFLR1</i>      | cg24860092 | -10.86 | 1.05 | 1.30E-23 | 6.79E-21 |
| ILMN_2339796 | <i>CDC16</i>       | cg04718414 | -10.86 | 1.30 | 3.22E-16 | 1.40E-13 |
| ILMN_1727389 | <i>CDC16</i>       | cg04718414 | -10.09 | 1.25 | 2.66E-15 | 9.88E-13 |
| ILMN_1692072 | <i>CENPBD1</i>     | cg08539210 | -3.48  | 0.44 | 8.05E-15 | 2.39E-12 |
| ILMN_1692072 | <i>CENPBD1</i>     | cg13969584 | -3.62  | 0.46 | 8.25E-15 | 2.39E-12 |
| ILMN_2359945 | <i>CES1</i>        | cg03880033 | -3.88  | 0.55 | 3.05E-12 | 7.95E-10 |
| ILMN_2256765 | <i>CDC16</i>       | cg04718414 | -8.29  | 1.20 | 1.23E-11 | 2.92E-09 |
| ILMN_1655077 | <i>PRDM1</i>       | cg00614392 | 4.94   | 0.80 | 9.53E-10 | 2.07E-07 |
| ILMN_2294784 | <i>PRDM1</i>       | cg00614392 | 3.39   | 0.57 | 4.46E-09 | 8.94E-07 |
| ILMN_1778010 | <i>IL32</i>        | cg05635274 | -4.73  | 0.82 | 1.21E-08 | 2.25E-06 |
| ILMN_1675386 | <i>CES1;CES1P1</i> | cg03880033 | -1.44  | 0.31 | 2.74E-06 | 4.75E-04 |
| ILMN_2368530 | <i>IL32</i>        | cg05635274 | -5.36  | 1.20 | 8.60E-06 | 0.0014   |
| ILMN_2154671 | <i>COX6B1</i>      | cg24860092 | -2.31  | 0.52 | 1.03E-05 | 0.0016   |
| ILMN_1770765 | <i>PRSS30P</i>     | cg05635274 | -3.22  | 0.76 | 2.64E-05 | 0.0038   |
| ILMN_1796417 | <i>ASNS</i>        | cg26284540 | 2.98   | 0.71 | 2.94E-05 | 0.0040   |
| ILMN_1734895 | <i>SFT2D1</i>      | cg01243879 | 1.96   | 0.47 | 3.57E-05 | 0.0046   |
| ILMN_1667893 | <i>TNS3</i>        | cg20258698 | 3.02   | 0.74 | 5.37E-05 | 0.0067   |
| ILMN_1804148 | <i>TMED4</i>       | cg04674755 | -2.53  | 0.63 | 6.02E-05 | 0.0071   |
| ILMN_1655167 | <i>ZNF502</i>      | cg14768256 | -0.96  | 0.24 | 7.48E-05 | 0.0085   |
| ILMN_1663080 | <i>LFNG</i>        | cg12400790 | -5.14  | 1.31 | 9.65E-05 | 0.0105   |
| ILMN_1767509 | <i>DEF8</i>        | cg08539210 | -2.53  | 0.65 | 1.13E-04 | 0.0118   |
| ILMN_1735058 | <i>CHST12</i>      | cg12400790 | 4.82   | 1.29 | 1.94E-04 | 0.0195   |
| ILMN_1786426 | <i>IGFLR1</i>      | cg15474831 | -9.83  | 2.66 | 2.37E-04 | 0.0228   |
| ILMN_1794364 | <i>CTSW</i>        | cg02230254 | -3.97  | 1.10 | 3.09E-04 | 0.0287   |
| ILMN_2339006 | <i>KIAA0564</i>    | cg14496523 | 2.59   | 0.72 | 3.65E-04 | 0.0328   |
| ILMN_1705617 | <i>CFL1</i>        | cg15777472 | 1.47   | 0.42 | 4.49E-04 | 0.0390   |
| ILMN_1778010 | <i>IL32</i>        | cg05185364 | -5.60  | 1.61 | 5.46E-04 | 0.0458   |
| ILMN_2374352 | <i>DBNDD1</i>      | cg08539210 | -2.61  | 0.76 | 6.57E-04 | 0.0535   |
| ILMN_2188204 | <i>ATG12</i>       | cg06682875 | 1.40   | 0.41 | 7.01E-04 | 0.0538   |
| ILMN_1723021 | <i>ICMT</i>        | cg19694465 | 1.70   | 0.50 | 7.03E-04 | 0.0538   |
| ILMN_1662741 | <i>LPAR2</i>       | cg03233793 | 2.68   | 0.80 | 8.79E-04 | 0.0642   |
| ILMN_1697561 | <i>FBXL16</i>      | cg09852871 | -2.38  | 0.71 | 9.01E-04 | 0.0642   |
| ILMN_1732023 | <i>PRDM7</i>       | cg13969584 | 1.33   | 0.40 | 9.12E-04 | 0.0642   |
| ILMN_1728535 | <i>COPZ1</i>       | cg20474425 | 1.67   | 0.51 | 1.04E-03 | 0.0715   |
| ILMN_2268156 | <i>LFNG</i>        | cg04021544 | 0.66   | 0.20 | 1.09E-03 | 0.0725   |
| ILMN_1793017 | <i>DGKQ</i>        | cg05448404 | -1.68  | 0.51 | 1.11E-03 | 0.0725   |
| ILMN_1767509 | <i>DEF8</i>        | cg13969584 | -2.20  | 0.68 | 1.28E-03 | 0.0815   |
| ILMN_1724437 | <i>GCAT</i>        | cg07059402 | -1.47  | 0.46 | 1.39E-03 | 0.0865   |
| ILMN_1732023 | <i>PRDM7</i>       | cg08539210 | 1.22   | 0.38 | 1.58E-03 | 0.0954   |

Probe ID: probe ID from the Illumina HumanHT12v4 Expression Beadchip; Expressed Gene: Gene corresponding to the probe ID; Coef: the model coefficient representing the difference in gene expression per 1% increase in methylation of the specified CpG-site; SE: standard error; P: Uncorrected P value; FDR: False discovery rate corrected P value. Only statistically significant associations after FDR-correction (corrected P < 0.1) are presented. The mRNA gene expression data was quantile-normalized to the median distribution and subsequently log2-transformed. The probe and sample means were centered to zero. Models were adjusted for white blood cell proportions, age, sex and batch effects.

## Supplementary Methods

### MoBa

#### *MoBa study population*

Participants in the current analysis include mother-offspring pairs from a substudy of the Norwegian Mother and Child Cohort Study (MoBa)<sup>1,2</sup> designed to evaluate the association between maternal plasma folate during pregnancy and childhood asthma status at 3 years of age.<sup>3</sup> We previously reported an association between maternal smoking during pregnancy and differential DNA methylation in 1,062 of the MoBa newborns.<sup>4</sup> We subsequently measured DNA methylation in an additional 685 newborns (including 221 with maternal plasma folate measurements) and following separate quality control, combined the two datasets as described below. We refer to these two datasets here as MoBa1 and MoBa2. The current analysis includes the 1,283 children who had cord blood DNA methylation measurements and maternal plasma folate measured during pregnancy at approximately 18 weeks gestation (N=1,062 from MoBa1, N=221 from MoBa2). The year of birth for participants in our analysis ranged from 2002 to 2004. The study was approved by the Regional Committee for Ethics in Medical Research, the Norwegian Data Inspectorate and the Institutional Review Board of the National Institute of Environmental Health Sciences, USA, and written informed consent was provided by all mothers participating.

#### *MoBa maternal folate, vitamin B12, homocysteine, vitamin D, and SNP measurements*

Maternal blood samples were drawn during pregnancy (median weeks gestation=18 weeks, 25<sup>th</sup>-75<sup>th</sup> percentile=16-21 weeks) in EDTA lined tubes, centrifuged within 30 minutes after collection, and stored at 4°C in the hospital where they were collected. Samples were then shipped overnight to the Biobank of MoBa at the Norwegian Institute of Public Health in Oslo. Upon receipt (1-2 days after blood collection), plasma was aliquoted onto polypropylene microtiter plates, sealed with heat-sealing foil sheets, and stored at -80°C. Plasma folate concentration was measured at Bevital AS ([www.bevital.no](http://www.bevital.no)) by microbiological assay, using a chloramphenicol-resistant strain of *Lactobacillus casei*,<sup>5</sup> which measures biologically active folate species, predominantly 5-methyl-tetrahydrofolate. The CV for this assay corresponds to 4% within-day and 5% between days, at population median.

Plasma cobalamin (vitamin B12) was determined by a *Lactobacillus leichmannii* microbiological assay.<sup>6</sup> Plasma levels of total homocysteine (tHcy), a marker of folate and cobalamin status, were assayed using a gas chromatography-mass spectrometry method based on methylchloroformate derivatization.<sup>7</sup> Plasma 25-hydroxyvitamin D2 and D3 was measured by liquid chromatography/tandem mass spectrometry<sup>8</sup> and the sum of 25-hydroxyvitamin D2 and D3 was used as a measure for vitamin D status.<sup>9</sup> The lower limit of detection and CV for each of these biomarkers is published elsewhere ([www.bevital.no](http://www.bevital.no)).

Two MTHFR SNPs were analyzed. These SNPs were genotyped using high-level multiplex genotyping based on matrix-assisted laser desorption/ionization time-of-flight mass spectrometry (MALDI-TOF MS) in the LOCUS laboratory as previously described.<sup>10</sup>

#### *MoBa covariates*

Information on maternal age, parity, and maternal education was collected via questionnaires completed by the mother or from birth registry records. Parity was categorized as 0, 1, 2, or  $\geq 3$  births. Maternal educational level was categorized into less than high school/secondary school, high school/secondary school completion, some college or university, or 4 years of college/university or more. Maternal smoking during pregnancy (yes vs. no) was assessed by maternal questionnaire and plasma cotinine, a biomarker of tobacco smoking, measured by liquid chromatography - tandem mass spectrometry<sup>11</sup> at approximately 18 weeks gestation. If a mother reported not smoking but had plasma cotinine  $\geq 56.8$  nmol/L she was categorized as a smoker. If a mother reported that she stopped in pregnancy and had cotinine values  $< 56.8$  nmol/L she was classified as a nonsmoker. Maternal age was included as a continuous variable.

#### *MoBa methylation measurements*

For the DNA methylation measurements and quality control for the MoBa1<sup>4</sup> and MoBa2 participants, umbilical cord blood samples were collected and frozen at birth at  $-80^{\circ}$  Celsius. All biological material was obtained from the Biobank of the MoBa study.<sup>2</sup> Bisulfite conversion was performed using the EZ-96 DNA Methylation kit (Zymo Research Corporation, Irvine, CA) and DNA methylation was measured at 485,577 CpGs in cord blood using Illumina's Infinium HumanMethylation450 BeadChip.<sup>12</sup> Raw intensity (.idat) files were handled in R using the *minfi* package<sup>13</sup> to calculate the methylation level at each CpG as the beta-value ( $\beta = \text{intensity of the methylated allele (M)} / (\text{intensity of the unmethylated allele (U)} + \text{intensity of the methylated allele (M)} + 100)$ ) and the data was exported for quality control and processing.

Probe and sample-specific quality control was performed in MoBa 1 and 2 datasets separately. Control probes (N=65) and probes on X (N=11,230) and Y (N=416) chromosomes were excluded in both datasets. Remaining CpGs missing  $>10\%$  of methylation data were also removed (N=20 in MoBa1, none in MoBa2). Samples indicated by Illumina to have failed or have an average detection P value across all probes  $< 0.05$  (N=49 MoBa1, N=35 MoBa2) and samples with gender mismatch (N=13 MoBa1, N=8 MoBa2) were also removed.

For each dataset, we accounted for the two different probe designs by applying the intra-array normalization strategy Beta Mixture Quantile dilation (BMIQ).<sup>14</sup> The Empirical Bayes method via *ComBat* was applied for batch correction using the *sva* package in R.<sup>15</sup> The two datasets were then combined and *ComBat* was run again to account for the potential batch effect of measuring methylation at two different time periods. The final MoBa dataset for this analysis included N=1,283 participants with measured DNA methylation, maternal plasma folate, and covariates and restricted to CpGs common to both MoBa1 and MoBa2 datasets (N=473,731).

## **Generation R**

### *Generation R study population*

The Generation R Study is a population-based prospective cohort study from fetal life onwards in Rotterdam, the Netherlands.<sup>16</sup> Assessments in pregnant women consisted of physical examinations, fetal ultrasounds, biological samples, and questionnaires.<sup>17</sup> All children were born between April 2002 and January 2006. The study has been approved by the Medical Ethical Committee of the Erasmus University Medical Centre and written consent was obtained from participating parents of their children. For the current study, data was available for 790 Caucasian mothers and their children with information on plasma folate and DNA-methylation; 713 with additional complete data on covariates.

### *Generation R maternal folate, vitamin B12, homocysteine, vitamin D, and SNP measurements*

Venous blood samples were drawn at enrollment of the mothers in early pregnancy (median: 12.9 weeks gestation; 25<sup>th</sup>-75<sup>th</sup> percentile=12.1-13.9 weeks) and stored at room temperature for a maximum of 3 hours. At birth, cord blood samples were collected by midwives or obstetricians<sup>17</sup>. Samples were transported to a laboratory facility of the regional laboratory in Rotterdam, Netherlands (Star-Medisch Diagnostisch Centrum) for additional processing and storage at -80°C. The samples were analyzed at the Department of Clinical Chemistry at the Erasmus University Medical Centre, Rotterdam. After thawing, the folate, vitamin B12, and homocysteine levels were analysed using an immunoelectrochemoluminescence assay on the Architect System (Abbott Diagnostics B.V., Hoofddorp, the Netherlands).<sup>18</sup> The between-run coefficient of variation for plasma folate was 8.9% at 5.6 nmol/l, 2.5% at 16.6 nmol/l and 1.5% at 33.6 nmol/l, with an analytical range of 1.8 - 45.3 nmol/l. The between-run coefficient of variation for serum vitamin B12 was 3.6% at 142 pmol/l, 7.5% at 308 pmol/l and 3.1% at 633 pmol/l, with an analytical range of 44 - 1476 pmol/l.<sup>18</sup> The between-run coefficient of variation for plasma homocysteine was 3.1% at 7.2 µmol/l, 3.1% at 12.9 µmol/l and 2.1% at 26.1 µmol/l, with an analytic range of 1 - 50 µmol/l. Folate, vitamin B12, and homocysteine levels were available in 80.8%, 79.9% and 76.5% of the mothers, respectively, and folate was available in 71.2% of the children.

We collected maternal venous blood samples in mid gestation [median 20.5 (range 18.1–24.9) weeks of gestation] to assess vitamin D levels. Levels of 25-hydroxyvitamin D were analysed from stored frozen samples at -80°C.<sup>17</sup> Measurements of maternal 25-hydroxyvitamin D levels were conducted at the Eyles Laboratory at the Queensland Brain Institute, University of Queensland, Australia. Total 25-hydroxyvitamin D level was reported as the sum of 25-hydroxyvitamin D2 and D3 species measured in plasma using a modification of a method previously described.<sup>19,20</sup> Inter-assay inaccuracy and imprecision were assessed at four concentration levels for 25-hydroxyvitamin D3 (48.3, 49.4, 76.4, and 139.2 nmol/L) and a single level (32.3 nmol/L) for 25-hydroxyvitamin D2 using certified reference materials purchased from the National Institute of Standards and Technology (NIST) (NIST SRM 972a levels 1–4) and were excellent at all concentration levels tested. Interassay inaccuracy and imprecision were both < 10% for 25-hydroxyvitamin D3 and < 17% for 25-



hydroxyvitamin D2. Assay repeatability was assessed via replicate analysis of an independent reference material (NIST SRM1950, 61.9 nmol/L 25-hydroxyvitamin D3), with interassay inaccuracy and imprecision both < 11% (n = 343).

Mothers were genotyped for rs1801131 and rs1801133 using a TaqMan allelic discrimination assay (Applied Biosystems) and Abgene QPCR ROX mix. The genotyping reaction was amplified using the GeneAmp PCR system 9600 [95°C (15 min), then 40 cycles of 94°C (15 s) and 60°C (1 min)]. Fluorescence was detected on the 7900HT Fast Real-Time PCR System (Applied Biosystems) and individual genotypes were determined using SDS software (version 2.3, Applied Biosystems).

### *Generation R covariates*

Information on maternal age, parity, and maternal education was collected by questionnaires at enrollment. Parity was categorized as nulliparity or multiparity, and maternal educational level as lower (none, primary or secondary education) or higher (more than secondary education) education. Maternal smoking during pregnancy was assessed by a questionnaire at enrollment. Information about maternal smoking during other periods of pregnancy was obtained by postal questionnaires sent in the second and third trimesters of pregnancy. Response rates for these questionnaires were 91%, 80%, 77%, respectively. Based on all three questionnaires, maternal smoking was classified into any reported active smoking during pregnancy (no, yes).<sup>17</sup>

### *Generation R methylation measurements*

DNA was extracted from cord blood samples of 979 Caucasian children. Using the EZ-96 DNA Methylation kit (Shallow-well) (Zymo Research Corporation, Irvine, USA), 500 ng DNA per sample underwent bisulfite conversion. Samples were transferred onto 96-well plates in a random order. Samples were processed with Illumina's Infinium HumanMethylation450 BeadChip (Illumina Inc., San Diego, USA). Quality control of analyzed samples was performed using standardized criteria. Samples were excluded due to sample call rate <99% (n=7) or poor bisulfite conversion (n=1). In addition, 2 samples were excluded because of a gender mismatch and 1 sample because of a retracted informed consent, leaving a total of 969 samples in the statistical analysis.

Probes with a single nucleotide polymorphism in the single base extension site with a frequency of > 1% in the GoNLv4 reference panel were excluded, as were probes with non-optimal binding (non-mapping or mapping multiple times to either the normal or the bisulphite-converted genome), resulting in the exclusion of 49,564 probes, leaving a total of 436,013 probes in the analysis.

Data were normalized with DASES normalization using a pipeline adapted from that developed by Touleimat and Tost.<sup>21</sup> DASES normalization includes background adjustment, between-array normalization applied to type I and type II probes separately, and dye bias correction applied to type I and type II probes separately. DASES is based on the DASEN method, but adds the dye bias correction, which is not included in DASEN.<sup>22</sup> Beta-values were calculated for all CpG sites.

## Supplementary References

1. Magnus, P. *et al.* Cohort profile: the Norwegian Mother and Child Cohort Study (MoBa). *Int J Epidemiol* **35**, 1146-50 (2006).
2. Ronningen, K.S. *et al.* The biobank of the Norwegian Mother and Child Cohort Study: a resource for the next 100 years. *Eur J Epidemiol* **21**, 619-25 (2006).
3. Haberg, S.E. *et al.* Maternal folate levels in pregnancy and asthma in children at age 3 years. *J Allergy Clin Immunol* **127**, 262-4, 264 e1 (2011).
4. Joubert, B.R. *et al.* 450K epigenome-wide scan identifies differential DNA methylation in newborns related to maternal smoking during pregnancy. *Environ Health Perspect* **120**, 1425-31 (2012).
5. O'Broin, S. & Kelleher, B. Microbiological assay on microtitre plates of folate in serum and red cells. *J Clin Pathol* **45**, 344-7 (1992).
6. Kelleher, B.P. & Broin, S.D. Microbiological assay for vitamin B12 performed in 96-well microtitre plates. *J Clin Pathol* **44**, 592-5 (1991).
7. Windelberg, A., Arseth, O., Kvalheim, G. & Ueland, P.M. Automated assay for the determination of methylmalonic acid, total homocysteine, and related amino acids in human serum or plasma by means of methylchloroformate derivatization and gas chromatography-mass spectrometry. *Clin Chem* **51**, 2103-9 (2005).
8. Midttun, O. & Ueland, P.M. Determination of vitamins A, D and E in a small volume of human plasma by a high-throughput method based on liquid chromatography/tandem mass spectrometry. *Rapid Commun Mass Spectrom* **25**, 1942-8 (2011).
9. Magnus, M.C. *et al.* Prospective study of maternal mid-pregnancy 25-hydroxyvitamin D level and early childhood respiratory disorders. *Paediatr Perinat Epidemiol* **27**, 532-41 (2013).
10. Meyer, K., Fredriksen, A. & Ueland, P.M. High-level multiplex genotyping of polymorphisms involved in folate or homocysteine metabolism by matrix-assisted laser desorption/ionization mass spectrometry. *Clin Chem* **50**, 391-402 (2004).
11. Midttun, O., Hustad, S. & Ueland, P.M. Quantitative profiling of biomarkers related to B-vitamin status, tryptophan metabolism and inflammation in human plasma by liquid chromatography/tandem mass spectrometry. *Rapid Commun Mass Spectrom* **23**, 1371-9 (2009).
12. Bibikova, M. *et al.* High density DNA methylation array with single CpG site resolution. *Genomics* **98**, 288-95 (2011).
13. Aryee, M.J. *et al.* Minfi: a flexible and comprehensive Bioconductor package for the analysis of Infinium DNA methylation microarrays. *Bioinformatics* **30**, 1363-9 (2014).
14. Teschendorff, A.E. *et al.* A beta-mixture quantile normalization method for correcting probe design bias in Illumina Infinium 450 k DNA methylation data. *Bioinformatics* **29**, 189-96 (2013).
15. Johnson, W.E., Li, C. & Rabinovic, A. Adjusting batch effects in microarray expression data using empirical Bayes methods. *Biostatistics* **8**, 118-27 (2007).
16. Jaddoe, V.W. *et al.* The Generation R Study: design and cohort update 2012. *Eur J Epidemiol* **27**, 739-56 (2012).
17. Kruithof, C.J. *et al.* The Generation R Study: Biobank update 2015. *Eur J Epidemiol* **29**, 911-27 (2014).
18. Bergen, N.E. *et al.* Homocysteine and folate concentrations in early pregnancy and the risk of adverse pregnancy outcomes: the Generation R Study. *Bjog* **119**, 739-51 (2012).
19. Eyles, D. *et al.* A sensitive LC/MS/MS assay of 25OH vitamin D3 and 25OH vitamin D2 in dried blood spots. *Clin Chim Acta* **403**, 145-51 (2009).
20. Gazibara, T. *et al.* Associations of maternal and fetal 25-hydroxyvitamin D levels with childhood lung function and asthma. The Generation R Study. *Clin Exp Allergy* (2015).
21. Touleimat, N. & Tost, J. Complete pipeline for Infinium((R)) Human Methylation 450K BeadChip data processing using subset quantile normalization for accurate DNA methylation estimation. *Epigenomics* **4**, 325-41 (2012).
22. Pidsley, R. *et al.* A data-driven approach to preprocessing Illumina 450K methylation array data. *BMC Genomics* **14**, 293 (2013).
